1                                   **Tracking down the molecular architecture of**  
2                                   **the synaptonemal complex by expansion microscopy**

3  
4                   Fabian U. Zwettler<sup>#1</sup>, Marie-Christin Spindler<sup>#2</sup>, Sebastian Reinhard<sup>1</sup>, Teresa Klein<sup>1</sup>,  
5                   Andreas Kurz<sup>1</sup>, Markus Sauer<sup>\*1</sup>, and Ricardo Benavente<sup>\*2</sup>

6  
7  
8  
9                   <sup>1</sup>Department of Biotechnology and Biophysics, Biocenter, University of Würzburg,  
10                  Am Hubland, 97074 Würzburg, Germany

11  
12                  <sup>2</sup>Department of Cell and Developmental Biology, Biocenter, University of Würzburg,  
13                  Am Hubland, 97074 Würzburg, Germany

14  
15  
16                  <sup>#</sup>These authors contributed equally to this work

17  
18                  Correspondence and requests for materials should be addressed to M.S. and R.B.  
19                  (m.sauer@uni-wuerzburg.de and benavente@biozentrum.uni-wuerzburg.de)

20  
21  
22  
23  
24  
25  
26  
27  
28  
29  
30  
31  
32  
33

34 **Abstract**

35 The synaptonemal complex (SC) is a meiosis-specific nuclear multiprotein complex that is  
36 essential for proper synapsis, recombination and segregation of homologous chromosomes. We  
37 combined structured illumination microscopy (SIM) with different ExM protocols including U-  
38 ExM, proExM, and magnified analysis of the proteome (MAP) to investigate the molecular  
39 organization of the SC. Comparison with structural data obtained by single-molecule localization  
40 microscopy of unexpanded SCs allowed us to investigate ultrastructure preservation of  
41 expanded SCs. For image analysis, we developed an automatic image processing software that  
42 enabled unbiased expansion factor determination. Here, MAP-SIM provided the best results and  
43 enabled reliable three-color super-resolution microscopy of the SCs of a whole set of  
44 chromosomes in a spermatocyte with 20-30 nm spatial resolution. Our data demonstrate that  
45 post-expansion labeling by MAP-SIM improves immunolabeling efficiency and allowed us thus to  
46 unravel previously hidden details of the molecular organization of SCs.

47

48

49

50

51

52

53

54

55

56

57

58

59

60

61

62

63

64

65 Imaging technologies are central platforms that drive fundamental research in virtually all  
66 disciplines across the biological and medical sciences. However, the diffraction barrier of  
67 classical fluorescence microscopy has hindered obtaining high-resolution information about the  
68 molecular architecture of protein assemblies and their interrelations. So far, only electron  
69 microscopy (EM) techniques provided a spatial resolution enabling the investigation of the  
70 molecular composition and structure of multiprotein complexes<sup>1</sup>. Super-resolution microscopy  
71 methods now can provide spatial resolution that is well below the diffraction limit of light  
72 microscopy approaching virtually molecular resolution<sup>2,3</sup>. Physical expansion of the cellular  
73 structure of interest represents an alternative approach to bypass the diffraction limit and  
74 enables super-resolution imaging on standard fluorescence microscopes. For this purpose,  
75 expansion microscopy (ExM) has been developed and successfully applied to visualize cellular  
76 structures with ~ 70 nm lateral resolution by confocal laser scanning microscopy<sup>4</sup>.

77 The original ExM protocol used functionalized antibody-oligonucleotide conjugates that bind to  
78 target proteins and cross-link covalently into a swellable hydrogel during polymerization. After  
79 degradation of native proteins by enzymatic proteolysis, the sample expands ~4.5-fold in water<sup>4</sup>.  
80 To circumvent fluorophore loss during polymerization and protease digestion alternative ExM  
81 protocols have been introduced enabling imaging of proteins, RNA, and bacteria in cultured  
82 cells, neurons, and tissues also in combination with super-resolution microscopy<sup>5-11</sup>. For  
83 example, protein-retention ExM (ProExM)<sup>6</sup> and magnified analysis of the proteome (MAP)<sup>7</sup> have  
84 been developed that cross-link proteins themselves into the polymer matrix. Replacing protein  
85 digestion by heat and chemical induced denaturation allows post-expansion immunolabeling of  
86 chemically embedded proteins. To further increase the achievable resolution, the expansion  
87 factor has been increased up to 20-fold<sup>12,13</sup>. However, such high expansion factors dramatically  
88 reduce the labeling density and consequently also the achievable structural resolution and  
89 require ultimately single-molecule sensitive imaging methods to visualize such extremely diluted  
90 fluorescence signals. Furthermore, some doubts remained concerning uniform three-  
91 dimensional (3D) expansion and preservation of ultrastructural details especially of multiprotein  
92 complexes. Very recently, it has been shown that various expansion protocols do not completely  
93 preserve the 3D molecular architecture of centrioles. Only by careful optimization of the  
94 expansion protocol ultrastructural details of centrioles could be truthfully preserved by U-ExM<sup>14</sup>.

95 In the present study, we tested the suitability of different ExM protocols for investigation of the  
96 molecular architecture of mammalian synaptonemal complexes (SCs) by structured illumination  
97 microscopy (SIM). With EM<sup>15-19</sup> and single-molecule localization microscopy<sup>20</sup> data available

98 about the distribution of SC proteins, it is ideally suited as a benchmark structure to evaluate  
99 isotropic expansion and structure preservation of different ExM protocols.

100 ExM-SIM has already been used to investigate the three-dimensional (3D) organization of  
101 *Drosophila* SCs with a lateral resolution of  $\sim 30$  nm<sup>21,22</sup>. To locate expanded sample as close as  
102 possible above the coverslip, they had to be dehydrated, cryosectioned into 10  $\mu$ m sections, and  
103 then again expanded and mounted on a coverslip. Finally, SIM with an oil-immersion objective  
104 and minimal spherical aberration has been performed. Here, we optimized sample handling to  
105 avoid dehydration and cryosectioning steps and enable super-resolution imaging of expanded  
106 SCs by SIM. Therefore, we used nuclear spreadings of mouse spermatocytes, a widely used  
107 technique to study nuclear proteins, specifically in the field of meiosis. The spreading of the SCs  
108 directly onto the surface of the coverslip results in the localization of the proteins close to the  
109 coverslip post-expansion and allows the use of a water-immersion objective for imaging of  
110 hydrogels without spherical aberrations. Further, we adapted the hydrogel composition that  
111 enabled us to completely detach and transfer the entire sample from the glass surface to the  
112 hydrogel. These optimizations and the use of SC spreadings enabled isotropic expansion of the  
113 sample and multicolor post-expansion epitope labeling with no need for dehydration and  
114 cryosectioning, thus providing a quicker, less error prone approach to study the 3D organization  
115 of nuclear proteins.

116 Very recently, ExM has been combined with single-molecule localization microscopy by STORM  
117 to elucidate the molecular organization of the murine chromosome axis of SCs on nuclear  
118 spreadings<sup>23</sup>. Using ExSTORM on 2.7x expanded samples, the authors achieved a lateral  
119 resolution of 20-30 nm, similar to the spatial resolution demonstrated previously by *d*STORM  
120 imaging of unexpanded SCs<sup>20</sup>. With a  $\sim$ 3-4x expansion factor in combination with a 2-fold  
121 increase in spatial resolution provided by SIM, currently Ex-SIM represents the method of choice  
122 for 3D multicolor super-resolution imaging of multiprotein complexes such as SCs. Therefore, we  
123 developed a robust workflow for Ex-SIM on nuclear spreadings together with an automated  
124 image processing software ('Line Profiler') to simplify the implementation of multicolor Ex-SIM  
125 and refined data analysis. The developed method allowed us to unravel new details of the  
126 molecular organization of SCs.

127

128

129

130

## 131 Results and Discussion

### 132 Analyzing SIM images of expanded SCs

133 Synaptonemal complexes (SCs) are meiosis-specific multiprotein complexes that are essential  
134 for synapsis, recombination and segregation of homologous chromosomes, resulting in the  
135 generation of genetically diverse haploid gametes, the prerequisite for sexual  
136 reproduction<sup>24,25</sup>. The SC exhibits an evolutionarily conserved ladder-like organization composed  
137 of two lateral elements (to which the chromatin of homologous chromosomes is associated) and  
138 a central region. The central region is formed by a central element running between the lateral  
139 elements, and numerous transverse filaments connecting the lateral elements and the central  
140 element (**Fig. 1**). Early EM 3D reconstructions show the ribbon-like lateral elements (LEs) of the  
141 SC spanning across the nucleus while turning around the own axis<sup>18</sup>. In mammals, eight SC  
142 protein components have been identified so far: the proteins SYCP2 and SYCP3 of the lateral  
143 elements, SYCP1 of transverse filaments and the proteins SYCE1, SYCE2, SYCE3, TEX12 and  
144 SIX6OS1 of the central element<sup>24,25</sup>. The assembly of the SC proteins into an elaborate  
145 molecular architecture is hereby tightly coordinated with essential meiotic processes and  
146 therefore conserved across species<sup>20-25</sup>. Consequently, localization maps of SC proteins are  
147 required to unravel the function of the molecular architecture of the SC in synapsis and  
148 recombination and thereby the overall success of meiosis.

149 In order to elucidate the precise molecular architecture of the SC, nanoscale resolution provided  
150 by either EM or super-resolution microscopy is required. Using immunolabeling and super-  
151 resolution microscopy by dSTORM the position of different proteins of the SC on nuclear  
152 spreadings have been visualized with approximately 20-30 nm lateral resolution. The images  
153 revealed that the lateral element protein SYCP3 shows a bimodal distribution separated by  
154  $221.6 \pm 6.1$  nm (SD) (**Fig. 2**)<sup>20</sup>. This value is in accordance with distances measured between  
155 the centers of the two ribbons of parallel oriented lateral elements by EM<sup>15-18</sup>. With SC protein  
156 distribution data available, structure preservation and uniform expansion of different ExM  
157 protocols can now be efficiently evaluated.

158 We started with immunolabeling of SYCP3, the N-termini of SYCP1 (SYCP1N), and SYCE3 as  
159 proteins of the lateral element, the transverse filaments, and the central element of the SC,  
160 respectively on nuclear spreadings using three different ExM protocols. To automatically and  
161 objectively analyze the average position of fluorescently labeled SC proteins and determine  
162 distances between bimodal distributed proteins from cross-sectional profiles, we developed 'Line  
163 Profiler', an automated image processing software (<https://line->

164 [profiler.readthedocs.io/en/latest/](http://profiler.readthedocs.io/en/latest/)<sup>26</sup>. Line Profiler uses several image-processing algorithms to  
165 evaluate potential regions of interest. In a first step all structures in the SYCE3 channel are  
166 reduced to lines with one pixel width by using a threshold and a skeletonize algorithm. The  
167 resulting pixel-coordinates are sorted and fitted with a c-spline. This gives an analytical  
168 description of the orientation of SYCE3 and therefore a good approximation for the center (line  
169 coordinates) and overall orientation of the helically arranged SYCP3 protein (2-channel mode)  
170 (**Supplementary Fig. 1**). Note that it is also possible to determine the orientation with a gradient  
171 image of the SYCP3 channel, if the SYCE3 channel cannot be evaluated (1-channel mode)  
172 (**Supplementary Fig. 2**).

173 To compute the distance between the SC strands, we applied a floodfill algorithm to the SYCP3  
174 channel, leaving only areas embedded in closed shapes unequal to zero. In combination with a  
175 distance transform, i.e. a computation of the distance of each point within the area to the nearest  
176 point outside, the regions, where the helical structure of the SC is in plane (regions of maximal  
177 distance between the strands) are revealed. All line coordinates outside of these areas were  
178 discarded. A line profile is subsequently constructed for each remaining line coordinate  
179 perpendicular to the derivative of the c-spline. For averaging, the line profiles are post aligned to  
180 the center between their peaks. We determined the expansion factors of the different protocols  
181 by comparing the distances between the maximum intensities of the two SYCP3 strands of  
182 unexpanded and expanded SCs imaged by *d*STORM and SIM, respectively (**Fig. 2**). SYCP3  
183 bimodal protein distributions of unexpanded SCs imaged with *d*STORM resulted in an average  
184 strand distance of 222 nm  $\pm$  33 nm (SD) consistent with our previous *d*STORM data<sup>20</sup>  
185 (**Supplementary Fig. 3**).

186

### 187 **Optimization of SC expansion**

188 We tested the pre-expansion labeling protocol proExM<sup>6</sup>, and the two post-expansion labeling  
189 protocols MAP<sup>7</sup> and U-ExM<sup>14</sup>. Among the three ExM protocols tested MAP outperformed the  
190 other protocols resulting in an average peak-to-peak distance of cross-sectional profiles of the  
191 SYCP3 signals of 632  $\pm$  73 nm (SD) determined using the 1-channel mode to analyze the cross-  
192 sectional profiles (**Methods** and **Supplementary Fig. 2**). With a bimodal distribution separated  
193 by 222 nm  $\pm$  33 nm (SD) as measured by *d*STORM from unexpanded SCs (**Supplementary**  
194 **Fig. 3**) the MAP protocol enabled three-color SIM imaging and provided an expansion factor of  $\sim$   
195 2.9x. U-ExM enabled post-expansion labeling with various fluorophores and three-color SIM but  
196 expanded SCs showed structural breaks indicating insufficient incorporation of proteins into the  
197 gel matrix (**Supplementary Fig. 4**). U-ExM provided an expansion factor of  $\sim$  2.4x using the 1-

198 channel mode method to analyze the cross-sectional profiles (**Supplementary Fig. 5**). On the  
199 other hand, proExM provided the largest expansion factor of  $\sim 4.0x$  using the 1-channel mode  
200 but pre-expansion labeling resulted in a lower labeling density due to irreversible fluorophore  
201 destruction during free-radical polymerization (**Supplementary Figs. 4 and 5**)<sup>4,6</sup>. Although the  
202 extent of irreversible fluorophore destruction during gelation varies across fluorophores  
203 multicolor imaging with pre-expansion labeling protocols remains challenging.

204 Furthermore, our MAP-SIM data (**Fig. 3**) show that the molecular architecture of the SCs is fully  
205 preserved demonstrating isotropic expansion. At first glance, this result appears surprising in  
206 light of our recent study evaluating the structure preservation of centrioles using different  
207 expansion protocols<sup>14</sup>. For centrioles, the MAP protocol was unsuited, as MAP-treated centrioles  
208 appeared even smaller when compared to unexpanded samples. Therefore, U-ExM has been  
209 introduced as a variation of the MAP protocol using weaker fixation that enabled excellent  
210 isotropic expansion and preservation of the centriole ultrastructure<sup>14</sup>. The main difference  
211 between centrioles and SCs is their biomolecular composition. While centrioles are solely  
212 composed of proteins, the SC consists of a tight association between DNA and proteins, which  
213 may affect expansion efficiency and isotropy. During fixation both proteins amongst each other  
214 as well as proteins and DNA are crosslinked. Possibly expansion of SCs requires stronger  
215 fixation conditions than used in the U-ExM protocol and at the same time an increased  
216 acrylamide concentration to preserve molecular identity and to enable detachment and full  
217 transfer of proteins into the gel. After gelation, the proteins are denatured at high temperatures  
218 using sodium dodecyl sulfate (SDS). Apart from denaturation, SDS also confers its negative  
219 charge to the proteins<sup>27,28</sup>. As the DNA is negatively charged as well, crosslinked DNA and  
220 proteins repel each other. We hypothesize that the repulsion between DNA and proteins  
221 facilitates isotropic expansion of SCs when using the MAP protocol with stronger fixation  
222 conditions.

223 Overall, MAP-SIM with an optimized gel composition enables isotropic  $\sim 2.9x$  expansion,  
224 efficient transfer of proteins into the hydrogel and molecular structure preservation of SCs. In  
225 combination with a two-fold resolution enhancement of SIM, MAP-SIM provides a similar spatial  
226 resolution as *d*STORM<sup>20</sup> but in addition a higher immunolabeling efficiency because of the  
227 improved epitope accessibility of post-expansion protocols<sup>14</sup>. Therefore, we used our optimized  
228 MAP-SIM approach (**Supplementary Fig. 6**) in all following experiments to investigate details of  
229 the molecular architecture of SCs.

230 Previous *d*STORM experiments have shown that the C-terminus of SYCP1 localizes to the inner  
231 edge of the lateral element and the N-termini of SYCP1 interact in the central element<sup>20</sup>. These



232 findings are in accordance with recent STORM experiments performed on 2.7x expanded  
233 nuclear spreadings<sup>23</sup>. Here, the SYCP1 N-terminus was located in the central element roughly  
234 110 nm away from the SYCP3 labeled lateral element (LE) while the SYCP1 C-terminus  
235 localized 25 nm more inward to SYCP3, which corresponds to the inner edge of the lateral  
236 element<sup>23</sup>. Further, in *d*STORM experiments the width of the monomodal localization  
237 distributions of the N-terminus of transverse filament protein SYCP1 and the central element  
238 protein SYCE3 were determined to  $39.8 \pm 1.1$  nm (SD) and  $67.8 \pm 2.1$  nm (SD), respectively, in  
239 frontal views of the SC<sup>20</sup>. The broader signal distribution of SYCE3 localizations indicates that  
240 the interaction of SYCP1 and SYCE3 might not be limited to the N-terminus of SYCP1. This is  
241 consistent with expanded MAP-SIM protein distributions of  $229.3 \pm 1.2$  nm (SD) (FWHM) for  
242 SYCE3 and  $161.5 \pm 1.3$  nm (SD) (FWHM) for SYCP1N analyzed from frontal and lateral views of  
243 the SC (**Supplementary Fig. 1**).

244 Since *d*STORM requires efficient photoswitching of organic dyes in oxygen depleted thiol-buffer,  
245 it is currently limited to two-color experiments, whereby carbocyanine dyes such as Cy5 and  
246 Alexa Fluor 647 are the best suited fluorophores<sup>29,30</sup>. In contrast, MAP-SIM provides similar  
247 resolution but enables imaging with up to three colors simultaneously without optimization of the  
248 photoswitching buffer conditions. The number of available laser lines thus only limits multicolor  
249 super-resolution microscopy experiments. Therefore, we immunolabeled the N-terminus of  
250 SYCP1, SYCE3, and SYCP3 with the same antibodies as used in the *d*STORM experiments in  
251 triple-localization MAP-SIM experiment (**Fig. 3**). The MAP-SIM images clearly exhibited similar  
252 details of the molecular architecture of SCs as single-molecule localization microscopy of  
253 unexpanded samples. In addition, the images confirmed isotropic expansion and preservation of  
254 the molecular structure of the SC. Intriguingly, spreading of SCs in combination with MAP  
255 allowed us to acquire 3D super-resolution images of large expanded samples, e.g.  $100 \times 100 \times$   
256  $30 \mu\text{m}^3$  (200 nm z-steps) by re-scan confocal microscopy (RCM)<sup>31</sup> and  $80 \times 80 \times 15 \mu\text{m}^3$  (110  
257 nm z-steps) and larger by SIM, i.e. imaging of the SCs of a whole set of chromosomes in a  
258 spermatocyte with detailed structural information of single chromosomes (**Fig. 3**).

259

## 260 **MAP-SIM reveals a complex network organization of the SC central region**

261 MAP-SIM images of lateral views of the SC reveal the topology of the transverse filament protein  
262 SYCP1 that is oriented perpendicularly to the lateral element protein SYCP3 and the central  
263 element protein SYCE3. *d*STORM and immunogold EM images showed a bimodal distribution of  
264 the N-terminus of SYCP1 and SYCE3 in twisted areas of the SC<sup>19,20</sup>. EM tomography uncovered  
265 a multilayered organization of the central element in insects<sup>32,33</sup>. On the other hand, EM



266 tomography based 3D models of the murine SC recently revealed the absence of a layered  
267 organization of the SC central region<sup>34</sup>.

268 Therefore, we next analyzed the signal distribution of the N-terminus of the transverse filament  
269 protein SYCP1 by MAP-SIM of nuclear spreadings in more detail. In addition to analyzing the  
270 distribution of proteins in frontal views, we also generated line profiles of SC proteins from lateral  
271 views, i.e. twisted areas of the SYCP3 signal (**Fig. 4** and **Supplementary Video 1**). In  
272 agreement with EM tomographic data<sup>34</sup>, the signal distributions of the MAP-SIM imaged SYCP1  
273 N-terminus and SYCE3 indicated a far more complex distribution of the central region proteins  
274 than the bimodal distribution previously described by *d*STORM and immunogold EM<sup>19,20</sup>.

275 In traditional immunofluorescence and immuno-EM preparations, antibodies have to compete for  
276 epitope accessibility of the densely packed central element. Free epitopes at the core of the  
277 central elements are difficult to access for IgG antibodies with a size of 10-15 nm taken that  
278 primary antibodies bound to the outer epitopes will shield more central epitopes. Using MAP-SIM  
279 epitope accessibility is improved due to the initial physical enlargement of the multiprotein  
280 complex before post-expansion labeling. The resulting higher labeling density, specifically at the  
281 core of the central element, provides a more fine-grained resolution of the molecular  
282 organization of the central element. Hence, MAP-SIM discloses new information about the  
283 molecular organization of the SC, particularly that the central element proteins are not organized  
284 unambiguously as distinct layers but they form a complex network composed of the transverse  
285 filament protein SYCP1 and the central element protein SYCE3 as well as other central element  
286 proteins in agreement with recent electron tomographic findings<sup>34</sup>.

287

## 288 **Molecular details of SC axes uncovered by MAP-SIM**

289 One striking morphological feature of the lateral elements, which could not be visualized before  
290 by light microscopy, is their occasional splitting into two or more sub lateral elements (subLEs).  
291 Variations of subLEs have been observed across species from animals to plants to yeast in  
292 various EM preparations (histological sections, whole-mount preparations, spreadings)<sup>15,35-41</sup>.  
293 Again, the continuous signal distribution of MAP-SIM allowed us to close the existing gap  
294 between light microscopy and EM and resolve the splitting of the-two SYCP3 strands in murine  
295 pachytene spermatocytes (**Fig. 5** and **Supplementary Video 2**). Spermatocytes contain 40  
296 chromosomes that synapse as bivalents of homologous chromosomes along the synaptonemal  
297 complex in order to recombine. The fully synapsed bivalents hereby span the nuclear space with  
298 the two pairs of telomeres residing at distant sides of the nuclear envelope. In the XY pair,

299 synapsis is confined to the pseudo-autosomal region and is therefore incomplete. In autosomes,  
300 MAP-SIM resolved a doubling of each of the SYCP3 strands (i.e. LEs) specifically, but not  
301 exclusively, at the sites where the helical synaptonemal complex twists (lateral view of the SC)  
302 and at the ends of the SYCP3 strands (**Fig. 5** and **Supplementary Video 2**).

303 With progression of prophase I, the degree of fraying at the end of the SYCP3 strands  
304 increases. In our experiments, we observed a bifurcation of the SYCP3 ends in mid-pachynema  
305 and a fraying of the ends into multiple strands in late pachynema/early diplotene (**Fig. 5** and  
306 **Supplementary Video 2**). These observations are in agreement with EM findings of subLEs in  
307 murine spreadings<sup>38</sup>. Here, a multistranded organization of the lateral elements that arrange into  
308 two compact subLEs through interaction with the two sister chromatids has been proposed<sup>37</sup>. In  
309 EM images of silver-stained spreadings of mouse SCs, both axes appeared double or  
310 multistranded with a higher frequency of subLEs at unpaired regions<sup>41</sup>. Using MAP-SIM, we  
311 resolved for the first time the reported fraying of the axes into SYCP3 positive fibrils by light  
312 microscopy. In accordance with the conservation of the subLEs of the autosomes, also the  
313 fraying of the XY axes is common in mammals<sup>42,43</sup>.

314 In mid-pachynema, the homologs are fully synapsed along the SC. Here, doubling of lateral  
315 elements is frequently observed and potentially related to the association with the two sister  
316 chromatids of the homologs. In diplotene, desynapsis starts and SCs gradually disassemble. At  
317 this stage, the lateral elements appear to disperse into individual SYCP3 fibrils. A strong degree  
318 of fraying has also been observed in unpaired regions of the XY pair. In 2014, Syrjänen *et al.*  
319 resolved the crystal structure of human SYCP3<sup>44</sup>. They showed that the tetrameric protein is  
320 approximately 20 nm long and is organized in an antiparallel arrangement that exposes its N-  
321 terminal DNA binding sites at either end. Binding to stretches of DNA, SYCP3 self-assembles  
322 into higher-order fibers that resemble the lateral elements in vitro. Based on doubling of the  
323 lateral elements observed in EM, it has been speculated that SYCP3 might assemble into one  
324 subLE per sister chromatid to prevent recombination between sister chromatids while  
325 maintaining chromatin cohesion<sup>45</sup>.

326

327

328

329

330

331

## 332 **Conclusion**

333 To close the discussion about the preservation of molecular structures and uniformity of  
334 expansion, we performed a comparison of the 3D molecular architecture of mammalian SCs as  
335 visualized by unexpanded *d*STORM<sup>20</sup> and expanded MAP-SIM. Taking advantage of the similar  
336 spatial resolution provided by the two methods, even smallest structural deviations are  
337 immediately apparent. We have shown that through isotropic structure preserving expansion  
338 combined with SIM, ultrastructural details of SCs can be revealed with standard  
339 immunofluorescence techniques in common sample preparations. Super-resolution microscopy  
340 techniques such as *d*STORM and PALM have enabled new insights into how proteins are  
341 organized in cells and multiprotein complexes, with a spatial resolution approaching virtually EM  
342 level<sup>2,3</sup>. Nevertheless, structural details of the molecular architecture of multiprotein complexes  
343 remained largely accessible only to EM methods. This inability of super-resolution microscopy  
344 methods is often due to insufficient structural resolution, which is ultimately controlled by the  
345 labeling density. Our results demonstrate that post-expansion labeling protocols substantially  
346 increases the epitope accessibility for IgG antibodies resulting in higher labeling densities  
347 especially of sterically demanding multiprotein complexes<sup>14</sup>. Consequently, MAP-SIM provides  
348 improved ultrastructural resolution as demonstrated here for an important DNA-associated  
349 multiprotein complex.

350

351

352

353

354

355

356

357

358

359

360

361

## 362 **Online Methods**

363 Animal care and experiments were conducted in accordance with the guidelines provided by the  
364 German Animal Welfare Act (German Ministry of Agriculture, Health and Economic  
365 Cooperation). Animal housing, breeding and were approved by the regulatory agency of the city  
366 of Wuerzburg (Reference 821-8760.00-10/90 approved 05.06.1992; according to §11/1 o.1 of  
367 the German Animal Welfare Act) and carried out following strict guidelines to ensure careful,  
368 consistent and ethical handling of mice.

## 369 **Reagents**

370 Acrylamide (AA, 40%, A4058, Sigma), Acryloyl-X, SE, 6-((acryloyl)amino)hexanoic Acid,  
371 Succinimidyl Ester (A20770, Thermo Fisher), Agarose (A9539, Sigma), Ammonium persulfate  
372 (APS, A3678, Sigma), Bovine Serum Albumin (BSA, A2153, Sigma), Dimethyl sulfoxide (DMSO,  
373 D12345, Thermo Fisher), Ethanol (absolute,  $\geq$  99.8%, 32205, Sigma),  
374 Ethylenediaminetetraacetic acid (EDTA, E1644, Sigma), Formaldehyde (FA, 36.5-38%, F8775,  
375 Sigma), Guanidine hydrochloride (guanidine HCl, 50933, Sigma), Glucose (G8270, Sigma),  
376 Glucoseoxidase (Sigma),  $\beta$ -Mercaptoethylamine (MEA, M9768, Sigma), N,N'-methylen-  
377 bisacrylamide (BIS, 2%, M1533, Sigma), N,N,N',N'-Tetramethylethylenediamine (TEMED,  
378 T7024, Sigma), Normal goat serum (50197Z, Thermo Fisher), PBS (P5493, Sigma), Poly-D-  
379 lysine hydropromide (P6407, Sigma), Polyoxyethylene (20) sorbitan monolaurate solution  
380 (Tween-20, 10%, 93774, Sigma), Potassium hydroxide (P1767, Sigma), Proteinase K (P4850,  
381 Sigma), Sodium acrylate (SA, 97-99%, 408220, Sigma), Sodium chloride (NaCl, S7653, Sigma),  
382 Sodium dodecyl sulfate (SDS, L3771, Sigma), Tris base (T6066, Sigma), Triton X-100 Surfact-  
383 Amps Detergent Solution (10% (w/v), 28313, Thermo Fisher), Tween 20 Surfact-Amps  
384 Detergent Solution (Tween-20, 28320, Sigma).

## 385 **Murine spermatocyte cell spread preparation**

386 Wildtype C57.6J/Bl6 mice were sacrificed using CO<sub>2</sub>, followed by cervical dislocation. Testes  
387 were resected and seminiferous tubules extracted and immersed in PBS after decapsulation of  
388 the testes. Next, nuclear spreadings were carried out as described by de Boer et al.<sup>46</sup>. Briefly,  
389 seminiferous tubules were transferred to hypotonic buffer and incubated for 60 minutes.  
390 Individual seminiferous tubules were transferred to sterile sucrose solution on a slide, disrupted  
391 with forceps and cells flushed out by resuspension with a 10  $\mu$ l pipette. In parallel, poly-lysine  
392 slides were immersed in 1% formaldehyde, substituted with acrylamide in case of the MAP and  
393 U-ExM protocol (30% AA, 4% FA in PBS for MAP and 1% AA, 0.7 % FA in PBS for U-ExM). 20

394  $\mu$ l of the testes cells in sucrose were transferred to a drop of the formaldehyde solution collected  
395 in a corner of the slide and spread evenly across the entire slide. Slides were incubated in a wet  
396 chamber for 2 hours and dried overnight in a wet chamber left ajar. To ensure ease of handling,  
397 nuclei were spread on round 18 mm coverslips (NO. 1.5H).

### 398 **Antibodies**

399 Guinea pig and rabbit anti-SYCP1 (N-terminal amino acids 1-124)<sup>2</sup>, guinea pig anti-SYCP3 (N-  
400 terminal amino acids 27-38) and rabbit anti-SYCE3 (full length protein) were generated by  
401 SeqLab through immunizing the host with the respective peptides and affinity purified before use.  
402 Rabbit anti-SYCP3 (NB300-232; derived against the C-terminus) was purchased from Novus  
403 Biologicals and mouse anti-SYCP3 (ab97672; full length protein) was purchased from Abcam.  
404 Al647 goat anti-guinea pig IgG (H+L), highly cross-adsorbed (A-21450) Invitrogen  
405 (ThermoFisher); goat anti-rabbit IgG (H+L) highly cross-adsorbed Alexa Fluor 568 (A-11036)  
406 was purchased from ThermoFisher; Alexa 488 conjugated AffiPure F(ab')<sub>2</sub> goat anti-guinea pig  
407 IgG (H+L) was purchased from Dianova (106-546-003). SeTau647 NHS (K9-4149; SETA  
408 Biomedicals) was conjugated to F(ab')<sub>2</sub> of goat anti-mouse IgG (SA-10225; ThermoFisher);  
409 F(ab')<sub>2</sub> goat anti-rabbit IgG (H+L) cross-adsorbed Alexa Fluor 647 (A-21246) and F(ab')<sub>2</sub> goat  
410 anti-mouse IgG (H+L) cross-adsorbed Alexa Fluor 488 (A-11017) were purchased from  
411 ThermoFisher. Supplementary Table 1 summarizes the immunolabeling used for the different  
412 experiments.

### 413 **Immunofluorescence of non-expanded SCs**

414 Coverslips with fixated nuclear spreadings were washed with PBS. Unspecific epitopes were  
415 blocked for 1 hour in 10 % NGS. Nuclear spreadings were incubated face down on 100  $\mu$ l of the  
416 primary antibody for 1 hour at room temperature in a humidified chamber. Spreadings were then  
417 washed with PBS and blocked for 30 minutes in 10 % NGS before incubation with the secondary  
418 antibody for 30 minutes at room temperature in a humidity chamber. For multi-color experiments,  
419 immunostaining was performed sequentially, starting with the antibody raised in mouse.

### 420 **Protein retention protocol (proExM)**

421 *Gel linker treatment.* In order to cross-link amide groups into the polymeric hydrogel network,  
422 samples were incubated in freshly prepared amine reactive AcX solution (0.1 mg/ml) in PBS.  
423 Dessicated AcX stocks (10 mg/ml) stored as aliquots at -20°C were therefore resuspended in 10  
424  $\mu$ l anhydrous DMSO and diluted 1:100 in PBS (1x). Samples were then covered with 1 ml AcX  
425 solution per coverslip and incubated at room temperature in a humidified chamber overnight.

426 *Gel formation, Digestion and Expansion.* Hydrogel formation was carried out on a cell culture  
427 plate lid covered with parafilm. The plate was placed on ice to provide a cooled and flat  
428 hydrophobic gelation surface. 80  $\mu$ l of pre-chilled (4°C) gelling solution (8.55 % SA, 2.5% AA,  
429 0.15 % Bis-AA, 0.2 % APS, 0.2% TEMED, 11.7% NaCl, 1x PBS) were prepared from proExM  
430 Monomer stock solution consisting of a mixture of acrylic copolymers and crosslinking agent  
431 (8.55 % SA, 2.5% AA, 0.15 % Bis-AA, 11.7% NaCl, 1x PBS) that was supplemented with radical  
432 polymerization initiator APS and accelerators TEMED right before use. The gel solution was  
433 placed on parafilm and coverslips were put on top of the formed droplet with spread cells facing  
434 down. After 5min incubation on ice, crosslinking polymerization was allowed to occur for 1.5  
435 hours at 37°C in a humidified chamber. Then samples were treated with 8 U /ml Proteinase K in  
436 Digestion Buffer (50 mM Tris pH (8.0), 1 mM EDTA, 0.5 % Triton X-100, 0.8 M guanidine HCl).  
437 For expansion of the samples, hydrogels were washed several times in double-deionized water  
438 until the maximum extent of swelling of the gels was reached.

#### 439 **Magnified analysis of the proteome (MAP) and ultrastructure expansion microscopy (U-** 440 **ExM) protocol**

441 *Gel linker treatment.* In the case of MAP and U-ExM expanded samples, spreads were  
442 incubated in AA/FA solution (30% AA, 4% FA in PBS for MAP and 1% AA, 0.7 % FA in PBS for  
443 U-ExM) for 4 hours at 37°C in a humidified chamber before proceeding with gelation of the  
444 samples.

445 *Gel formation, Denaturation and Expansion.* Following AA/FA incubation, samples were washed  
446 three times for 5 minutes each in PBS (1x). Then polymerization of hydrogels was performed as  
447 described under 'ProExM protocol' using an optimized MAP Gel solution (7 % SA, 20 % AA,  
448 0.05 % Bis-AA, 0.5% APS, 0.5% TEMED, 1x PBS) or U-ExM Gel solution (19% SA, 10% AA,  
449 0.1% BIS-AA, 0.5% APS, 0.5% TEMED, 1x PBS). The MAP monomer solution composition was  
450 altered compared to the original recipe<sup>7</sup> regarding the monomer to crosslinking agent ratio. After  
451 polymerization hydrogels were carefully removed from the coverslips and transferred directly into  
452 pre-heated (95°C) Denaturation buffer (200 mM SDS, 200mM NaCl, 50 mM Tris, pH 9.0) in 1.5  
453 ml centrifuge tubes. Samples were then denaturated for 1 hour in a heating block incubator with  
454 closed tube lids. For swelling of the sample, hydrogels were washed with excess volume of  
455 double-deionized water that was exchanged several times until the maximum expansion level  
456 was reached.

#### 457 **Post-expansion immunolabeling of MAP and U-ExM treated samples**



458 For MAP and U-ExM treated samples immunostaining was performed post expansion. Fully  
459 expanded gels were incubated in Blocking buffer (0.15% BSA in PBS) twice for 30 minutes  
460 each. Gels shrink during this blocking step. Then primary antibodies were incubated sequentially  
461 for 3 hours each at 37°C in a humidified chamber with two 20 minutes washing steps in Blocking  
462 buffer following each antibody incubation step. Next a secondary antibodies mix was added  
463 simultaneously for 3 hours at 37°C in a humidified chamber. Samples were then washed twice  
464 for 30 minutes each with Washing Buffer (0.1 % Tween-20 in PBS) and once more overnight.  
465 Samples were then washed in double-deionized water and expanded back to the maximum  
466 hydrogel volume.

### 467 **Mounting of expanded samples**

468 *Poly-Lysine coating of cover glasses.* 24 mm round cover glasses (NO. 1.5. H) were sonicated in  
469 double-deionized water, 1 M KOH and absolute ethanol ( $\geq 99.8\%$ ) for 15 minutes each.  
470 Following each sonication step glasses were rinsed with double-deionized water. After  
471 sonication glasses were finally dried at 100°C in an oven. Cover glasses were then covered with  
472 0.1% Poly D-Lysine and incubated for 1 hour at room temperature. Next glasses were washed  
473 again with water and air-dried and stored in a closed glass container to avoid dust  
474 contamination. Coated coverslips were stored at 4°C and used for up to one week.

475 *Fluorescent Marker treatment of cover glasses.* Fluorescent beads introduced directly into the  
476 hydrogel show strong fluorescence loss caused by persulfate radicals during polymerization. For  
477 this reason we directly coated coverslips with fluorescent markers to perform channel alignment.  
478 Therefore, fluorescent marker stock suspension (0.1  $\mu\text{m}$ ,  $\sim 1.8 \times 10^{11}$  particles/mL, TetraSpeck  
479 Microspheres, Thermo Fisher) was vortexed for  $\sim 1$  minute and then diluted 1:1000 in PBS (1x)  
480 and vortexed again briefly. Glasses were covered with the suspension for 30 minutes at room  
481 temperature to let the fluorescent markers settle down. Then coverslips were washed with  
482 double-deionized water, air-dried and thereupon used for hydrogel immobilization with Agarose.

483 *Agarose embedding.* Expanded samples were cut into  $\sim 1.5 \times 1.5$  cm pieces using a razor blade  
484 and excess water was removed carefully from the gels with laboratory wipes. Gels were then  
485 transferred onto Poly-Lysine coated coverslips. To further avoid drifting of the sample during  
486 long-term image acquisition gels were additionally embedded in 1 % (w/v) Agarose in water.  
487 Therefor a second uncoated round 18 mm-coverslip was placed on top of the cut hydrogel and  
488 melted Agarose ( $\sim 40^\circ\text{C}$ ) was carefully applied around the sides of the hydrogel using a pipette.  
489 Care was taken to avoid Agarose from flowing below the hydrogel. The agarose gel was  
490 subsequently hardened at 4°C for  $\sim 10$  minutes and the upper coverslip was removed carefully.  
491 Double deionized water was then added on the hydrogel to prevent dehydration during imaging.



## 492 **Imaging**

493 *Structured Illumination Microscopy (SIM) imaging.* SIM imaging was performed using a Zeiss  
494 Elyra S.1 SIM imaging system consisting of an inverse Axio Observer. Z1 microscope equipped  
495 with a C-APOCHROMAT 63x (NA 1.2) water-immersion objective and four different excitation  
496 lasers (405 nm diode, 488 nm OPSL, 561 nm OPSL and 642 nm diode laser). Three-  
497 dimensional SIM imaging of the expanded sample was recorded on a PCO edge sCMOS  
498 (scientific complementary metal-oxide semiconductor) camera with 0.110  $\mu\text{m}$  z steps adjusted  
499 by an inserted Z-Piezo stage. Three rotations of the grid pattern were projected on the image  
500 plane for each acquired channel. The red fluorophore was imaged before fluorophores with  
501 lower wavelengths to minimize photobleaching. Raw data images were processed using the  
502 Zeiss ZEN software (black edition).

503 *Channel alignment for SIM images.* Fluorescent beads mounted on the coverslip that were  
504 localized directly below the sample imaging area were set as lowest imaging plane and recorded  
505 with the sample for each 3D z-stack. For alignment and SIM processing images containing  
506 fluorescent markers were cropped out and used to align the channels in each recorded z-stack  
507 via the Zeiss Zen software channel alignment tool.

508 *Rescanning confocal microscopy (RCM) imaging.* RCM imaging was conducted on a Nikon TiE  
509 inverted microscope combined with an RCM unit (Confocal.nl). RCM derives from the image-  
510 scanning principle whereby pixel reassignment is carried out purely optomechanically<sup>31,47</sup>. The  
511 unit is connected to a Cobolt Skyra (Cobolt, Hübner Group) laser unit providing four excitation  
512 laser lines (405 nm, 488 nm, 561 nm, and 640 nm). Images were recorded on an sCMOS  
513 camera (Zyla 4.2 P, Andor) using a 60x water-immersion objective (CFI Plan APO, 1.27-NA;  
514 Nikon) and a fixed 50  $\mu\text{m}$  pinhole size. The setup was operated by the microscope software NIS-  
515 Elements (version 4.6).

516 *dSTORM imaging.* dSTORM acquisition of unexpanded samples were conducted on a home-  
517 built widefield imaging setup as described previously<sup>20</sup>. The setup consists of an inverted IX71  
518 microscope (Olympus) equipped with an oil-immersion objective (APON 60XOTIRF, NA 1.49,  
519 Olympus). For excitation of Alexa Fluor 647, a 639 nm OPS laser diode (Genesis MX639-1000  
520 STM; Coherent) was used in quasi-TIRF mode. To avoid drift during acquisition a nose-piece  
521 stage (IX2-NPS, Olympus) is implemented in the microscope. Fluorescence light was collected  
522 onto an electron-multiplying charge-couple device (EM-CCD) camera (iXon Ultra 897, Andor).  
523 As photoswitching buffer 100 mM  $\beta$ -Mercaptoethylamine in PBS (pH 7.4) supplemented with 10  
524 % (w/v) glucose and 0.5 mg/ml glucose oxidase as oxygen scavenger system was used. For  
525 image reconstruction the ImageJ plugin ThunderSTORM<sup>48</sup> was used.

## 526 **Protein position analysis**

527 *SC cross-sectional profiles using 'Line Profiler'.* The SYCE3 input image is convolved with a  
528 gaussian blur, compensating noise and intensity fluctuations. Via Otsu<sup>47</sup> thresholding the image  
529 is converted into a binary image. Using Lee's algorithm<sup>7</sup> a skeletonize image is constructed  
530 reducing all expanded shapes to lines with 1 pixel width. Subsequently all connected pixels  
531 unequal to zero were sorted and checked for continuity, i.e. sharp edges mark a breakpoint  
532 initiating a new line. The pixel coordinates of each line were fitted with a c-spline. The c-splines  
533 coordinates and local derivatives are a good estimation for the center and orientations of the  
534 helix structure SYCP3 channel. Note that the orientation and center of the SYCP3 channel can  
535 also be estimated with Sobel filters, if the SYCE3 channel cannot be evaluated ('1 channel'  
536 mode). To receive the areas of maximum distance, i.e. the areas where the SYCP3 helix  
537 structure is in plane, a floodfill algorithm and a distance transform<sup>8</sup>, with a subsequent  
538 thresholding to 40 % of the maximum value, were applied. Using a logical and operation on the  
539 line coordinates and the thresholded distance transform image resulted in the desired source  
540 coordinates and directions for further evaluation. Line profiles were then constructed originating  
541 at the source coordinates perpendicular to the c-splines derivative or respectively in Sobel  
542 gradient direction at the edge points of the SYCP3 channel. The line profiles were post aligned  
543 at the center of the two global maxima. Average profiles were returned for each line and for the  
544 whole image.

545 *Protein distribution of SYCE3 and SYCP1N.* To determine the distribution of SYCE3, areas of  
546 the SYCE3 signal were manually chosen from regions where SYCP3 strands showed a helix  
547 crossing. These regions can be regarded as frontal views of the SYCE3 and SYCP1N proteins  
548 and were used for cross-sectional profiling (**Fig 4**).

549 *Expansion factor determination.* The expansion factor was determined by dividing the distances  
550 of the two SYCP3 strands measured from expanded SIM and unexpanded *d*STORM  
551 measurements. Here, strand distances of unexpanded SCs visualized by *d*STORM were  
552 determined using the 'Line Profiler' with Sobel filter settings for '1 channel' analysis as described  
553 above and shown in **Supplementary Fig. 3**. Although the analysis of expanded MAP-SIM and  
554 U-ExM SIM data are possible using the SYCE3 channel to determine SC orientation, for reasons  
555 of comparability the expanded strand distance values were determined in the same '1-channel  
556 mode' Line Profiler settings as for unexpanded *d*STORM analysis. Note that the '2-channel  
557 mode' also includes areas which are closer to the SYCP3 strand crossings in comparison to the  
558 '1-channel mode' (compare **Supplementary Fig. 1** and **Supplementary Fig. 2**). The expansion

559 factor was then calculated by dividing the resulting mean values of expanded SYCP3 distances  
560 with the distance mean value of unexpanded dSTORM data.

561 *3D visualization of MAP-SIM data.* 3D MAP SIM data shown in **Supplementary Video 1** and  
562 **Supplementary Video 2** were visualized using the microscopy image analysis software IMARIS  
563 (version 8.4.1, Bitplane).

564 *Averaging of cross-sectional profiles.* The resulting cross-sectional profiles were finally averaged  
565 using the data analysis software Origin(Pro) Version 2016.

## 566 **References**

- 567 1. Koster, A. J. & Klumperman, J. Electron microscopy in cell biology: integrating structure and  
568 function. *Nat. Rev. Mol. Cell Biol. Suppl.* SS6-10 (2003).
- 569 2. Sauer, M. & Heilemann, M. Single-molecule localization microscopy in eukaryotes. *Chem.*  
570 *Rev.* **117**, 7478-7509 (2017).
- 571 3. Schermelleh, L. *et al.* Super-resolution microscopy demystified. *Nat. Cell Biol.* **21**, 72-84  
572 (2019).
- 573 4. Chen, F., Tillberg, P. W. & Boyden, E. S. Optical imaging expansion microscopy. *Science*  
574 **347**, 543–548 (2015).
- 575 5. Chozinski, T. J. *et al.* Expansion microscopy with conventional antibodies and fluorescent  
576 proteins. *Nat. Methods* **13**, 485–488 (2016).
- 577 6. Tillberg, P. W. *et al.* Protein-retention expansion microscopy of cells and tissues labeled  
578 using standard fluorescent proteins and antibodies. *Nat. Biotechnol.* **34**, 987–992 (2016).
- 579 7. Ku, T. *et al.* Multiplexed and scalable super-resolution imaging of three-dimensional protein  
580 localization in size-adjustable tissues. *Nat. Biotechnol.* **34**, 973–981 (2016).
- 581 8. Chen, F. *et al.* Nanoscale imaging of RNA with expansion microscopy. *Nat. Methods* **13**,  
582 679–684 (2016).
- 583 9. Cahoon, C. K. *et al.* Superresolution expansion microscopy reveals the three-dimensional  
584 organization of the Drosophila synaptonemal complex. *Proc. Natl. Acad. Sci. USA* **114**,  
585 E6857-E6866 (2017).
- 586 10. Gao, M. *et al.* Expansion stimulated emission depletion microscopy (ExSTED). *ASC Nano*  
587 **12**, 4178-4185 (2018).
- 588 11. Kunz, T.C., Götz, R., Sauer, M. & Rudel, T. Detection of Chlamydia developmental forms  
589 and secreted effectors by expansion microscopy. *Front. Cell. Infect. Microbiol.* **9**, 276 (2019).
- 590 12. Truckenbrodt, S., Maidorn, M., Crzan, D., Widhagen, H., Kabatas, S. & Rizzoli, S. O. X10  
591 expansion microscopy enables 25-nm resolution on conventional microscopes. *EMBO Rep.*  
592 e45836 (2018).

- 593 13. Chang, J. B. *et al.* Iterative expansion microscopy. *Nat. Methods* **14**, 593–599 (2017).
- 594 14. Gambarotto, D. *et al.* Imaging cellular ultrastructures using expansion microscopy (U-ExM).  
595 *Nat. Methods* **16**, 71-74 (2019).
- 596 15. Moses, M. J. (1968). Synaptonemal complex. *Annual review of genetics* **2**, 363-412.
- 597 16. Sotelo, J. R. (1969). Ultrastructure of the chromosomes in meiosis. In: Handbook of  
598 Molecular Cytology, Ed. Lima de Faria A, pp 412-434; 1969, North Holland Pub. Co.  
599 Amsterdam.
- 600 17. Westergaard, M., & von Wettstein, D. (1972). The synaptonemal complex. *Annu. Rev.*  
601 *Genet.* **6**, 71-110.
- 602 18. Schmekel, K., & Daneholt, B. (1995). The central region of the synaptonemal complex  
603 revealed in three dimensions. *Trends in cell biology* **5**, 239-242.
- 604 19. Hernández-Hernández, A., Masich, S., Fukuda, T., Kouznetsova, A., Sandin, S., Daneholt,  
605 B., & Höög, C. (2016). The central element of the synaptonemal complex in mice is  
606 organized as a bilayered junction structure. *J. Cell Sci* **129**, 2239-2249.
- 607 20. Schücker, K., Holm, T., Franke, C., Sauer, M. & Benavente, R. Elucidation of synaptonemal  
608 complex organization by super-resolution imaging with isotropic resolution. *Proc. Natl. Acad.*  
609 *Sci. USA* **112**, 2029–2033 (2015).
- 610 21. Cahoon, C. K., Yu, Z., Wang, Y., Guo, F., Unruh, J. R., Slaughter, B. D., & Hawley, R. S.  
611 (2017). Superresolution expansion microscopy reveals the three-dimensional organization of  
612 the Drosophila synaptonemal complex. *Proceedings of the National Academy of Sciences*  
613 **114**, E6857-E6866.
- 614 22. Wang, Y. *et al.* Combined expansion microscopy with structured illumination microscopy for  
615 analyzing protein complexes. *Nat. Protocols* **13**, 1869–1895 (2018).
- 616 23. Xu, H. *et al.* Molecular organization of mammalian meiotic chromosome axis revealed by  
617 expansion STORM microscopy. *Proc. Natl. Acad. Sci. USA* **116**, 18423-18428 (2019).
- 618 24. Fraune, J., Schramm, S., Alsheimer, M. & Benavente, R. The mammalian synaptonemal  
619 complex: protein components, assembly and role in meiotic recombination. *Exp. Cell Res.*  
620 **318**, 1340-1346 (2012).
- 621 25. Bolcun-Filas, E. & Handel, M.A. Meiosis: the chromosomal foundation of reproduction. *Biol.*  
622 *Reprod.* **99**, 112-126 (2018).
- 623 26. Zwettler, F. *et al.* (2019) Synaptonemal Complex Line Profiler. 10.5281/zenodo.2643214  
624 <https://doi.org/10.5281/zenodo.2643214>
- 625 27. Laemmli, U. K. (1970). Cleavage of structural proteins during the assembly of the head of  
626 bacteriophage T4. *Nature* **227**, 680.

- 627 28. Ninfa, A. J., & Ballou, D. P. (1998). *Fundamental laboratory approaches for biochemistry and*  
628 *biotechnology* (pp. 247-271). Bethesda, MD: Fitzgerald Science Press.
- 629 29. van de Linde, S. *et al.* (2011) Direct stochastic optical reconstruction microscopy with  
630 standard fluorescent probes. *Nat. Protocols* **6**, 991-1009.
- 631 30. Dempsey, G. T., Vaughan, J. C., Chen, K. H., Bates, M., & Zhuang, X. (2011). Evaluation of  
632 fluorophores for optimal performance in localization-based super-resolution imaging. *Nature*  
633 *Methods* **8**, 1027.
- 634 31. De Luca, G.M.R., Greedijk, R.M.P., Brandt, R.A.J., Zellenberg, C.H.C., de Jong, B.E.,  
635 Timmermanns, W., Azar, L.N., Hoebe, R.A., Stallinga, S. & Manders, E.M.M. (2013) Re-scan  
636 confocal microscopy: scanning twice for better resolution. *Biomed. Opt. Express* **4**, 2644-  
637 2656.
- 638 32. Schmekel, K., Wahrman, J., Skoglund, U., & Daneholt, B. (1993a). The central region of the  
639 synaptonemal complex in *Blaps cribrosa* studied by electron microscope tomography.  
640 *Chromosoma* **102**, 669-681.
- 641 33. Schmekel, K., Skoglund, U., & Daneholt, B. (1993b). The three-dimensional structure of the  
642 central region in a synaptonemal complex: a comparison between rat and two insect  
643 species, *Drosophila melanogaster* and *Blaps cribrosa*. *Chromosoma* **102**, 682-692.
- 644 34. Spindler, MC. *et al.* (2019). Quantitative basis of meiotic chromosome synapsis analyzed by  
645 electron tomography. *BioRxiv* [Preprint]. Available at <https://doi.org/10.1101/705764>.
- 646 35. Comings, D. E., & Okada, T. A. (1971). Fine structure of the synaptonemal complex: Regular  
647 and stereo electron microscopy of deoxyribonuclease-treated whole mount preparations.  
648 *Experimental cell research* **65**, 104-116.
- 649 36. Counce, S. J., & Meyer, G. F. (1973). Differentiation of the synaptonemal complex and the  
650 kinetochore in *Locusta* spermatocytes studied by whole mount electron microscopy.  
651 *Chromosoma* **44**, 231-253.
- 652 37. Wahrman, J. (1981). Synaptonemal complexes-Origin and Fate. *Chromosomes today* **7**,  
653 105-113.
- 654 38. Heyting, C., Dietrich, A. J., Redeker, E. J. W., & Vink, A. C. (1985). Structure and  
655 composition of synaptonemal complexes, isolated from rat spermatocytes. *European journal*  
656 *of cell biology*, **36**, 307-314.
- 657 39. Dresser, M. E., & Moses, M. J. (1980). Synaptonemal complex karyotyping in spermatocytes  
658 of the Chinese hamster (*Cricetulus griseus*). *Chromosoma* **76**, 1-22.
- 659 40. Nebel, B. R., & Coulon, E. M. (1962). The fine structure of chromosomes in pigeon  
660 spermatocytes. *Chromosoma* **13**, 272-291.

- 661 41. Del Mazo, J., & Gil-Alberdi, L. G. (1986). Multistranded organization of the lateral elements  
662 of the synaptonemal complex in the rat and mouse. *Cytogenetic and Genome Research* **41**,  
663 219-224.
- 664 42. Solari, A. J. (1993). *Sex chromosomes and sex determination in vertebrates*. CRC Press.
- 665 43. Sciurano, R. B., De Luca, G., Rahn, I. M., & Solari, A. J. (2017). The XY Body of the Cat  
666 (*Felis catus*): Structural Differentiations and Protein Immunolocalization. *Cytogenetic and*  
667 *genome research* **152**, 137-147.
- 668 44. Syrjänen, J. L., Pellegrini, L., & Davies, O. R. (2014). A molecular model for the role of  
669 SYCP3 in meiotic chromosome organisation. *Elife* **3**, e02963.
- 670 45. Franco, M. J., Sciurano, R. B., & Solari, A. J. (2007). Protein immunolocalization supports  
671 the presence of identical mechanisms of XY body formation in eutherians and marsupials.  
672 *Chromosome research* **15**, 815-824.
- 673 46. de Boer, E., Lhuissier, F. G., & Heyting, C. (2009). Cytological analysis of interference in  
674 mouse meiosis. In *Meiosis* (pp. 355-382). Humana Press, Totowa, NJ.
- 675 47. Luca, G. M. R. de *et al.* (2017) Configurations of the Re-scan Confocal Microscope (RCM)  
676 for biomedical applications. *Journal Microsc.* **266**, 166–177).
- 677 48. Ovesný, M., Křížek, P., Borkovec, J., Švindrych, Z. & Hagen, G. M. (2014) ThunderSTORM:  
678 a comprehensive ImageJ plug-in for PALM and STORM data analysis and super-resolution  
679 imaging. *Bioinformatics* **30**, 2389–2390.

680

## 681 **Acknowledgements**

682 The authors thank Dominic Helmerich for technical assistance with the SeTau647 labeled  
683 antibody. This work was supported by the German Research Foundation (TRR 166 Receptor  
684 Light project A04, and Be1168/8-1). M.C.S was supported by a Boehringer Ingelheim Fonds  
685 Travel Grant and a HHMI Grant to attend the 2018 CSHL course 'Quantitative Imaging: From  
686 Acquisition to Analysis' and wishes to thank the faculty of the course for excellent training and  
687 illuminating discussion benefitting the preparation of this manuscript- specifically Jennifer  
688 Waters, Talley Lambert, Hunter Elliot and Suliana Manley, as well as Marcelo Cicconet, Jessica  
689 Hornick, Anna Jost, and Michael Weber.

## 690 **Author contributions**

691 F.U.Z., M.C.S., M.S., and R.B. conceived and designed the project. M.S and R.B. supervised the  
692 project. F.U.Z, M.C.S., A.K. and T.K performed all experiments. S.R. developed Line profiler.  
693 S.R. and F.U.Z. performed data analysis. All authors wrote and revised the final manuscript.



694 **Additional information**

695 Supplementary information accompanies this paper at .....

696 **Ethics statement**

697 Animal care and experiments were conducted in accordance with the guidelines provided by the  
698 German Animal Welfare Act (German Ministry of Agriculture, Health and Economic  
699 Cooperation). Animal housing, breeding and experimental protocols were approved by the  
700 regulatory agency of the city of Wuerzburg (Reference 821-8760.00-10/90; according to §11/1  
701 No.1 of the German Animal Welfare Act) and carried out following strict guidelines to ensure  
702 careful, consistent and ethical handling of mice.

703 **Competing interests:** The authors declare no competing interests.

704

705 **Figures**

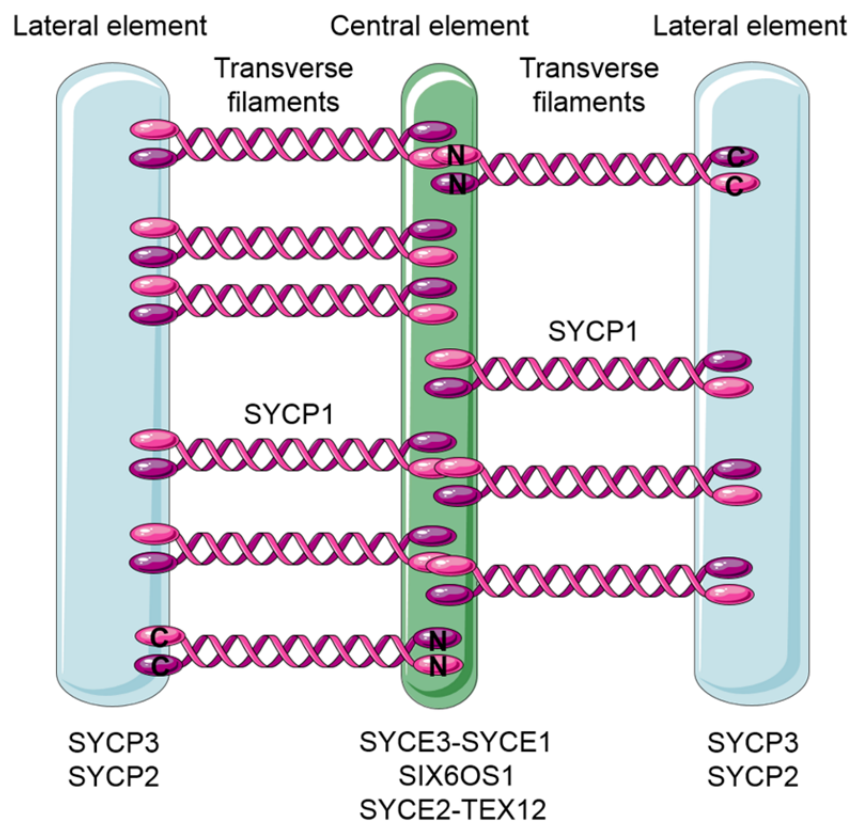

706

707 **Figure 1. The synaptonemal complex.** Schematic representation of the tripartite SC structure  
708 showing the two lateral elements (LEs) consisting of SYCP2 and SYCP3 flanking the central  
709 element comprised of SYCE1/2/3, Tex 12 and SIX6OS1. The transverse filament protein SYCP1  
710 is connecting the lateral element and the central element with the SYCP1 C-terminus residing in  
711 the lateral and the N-terminus in the central element<sup>34</sup>.



712

713

714

715

716

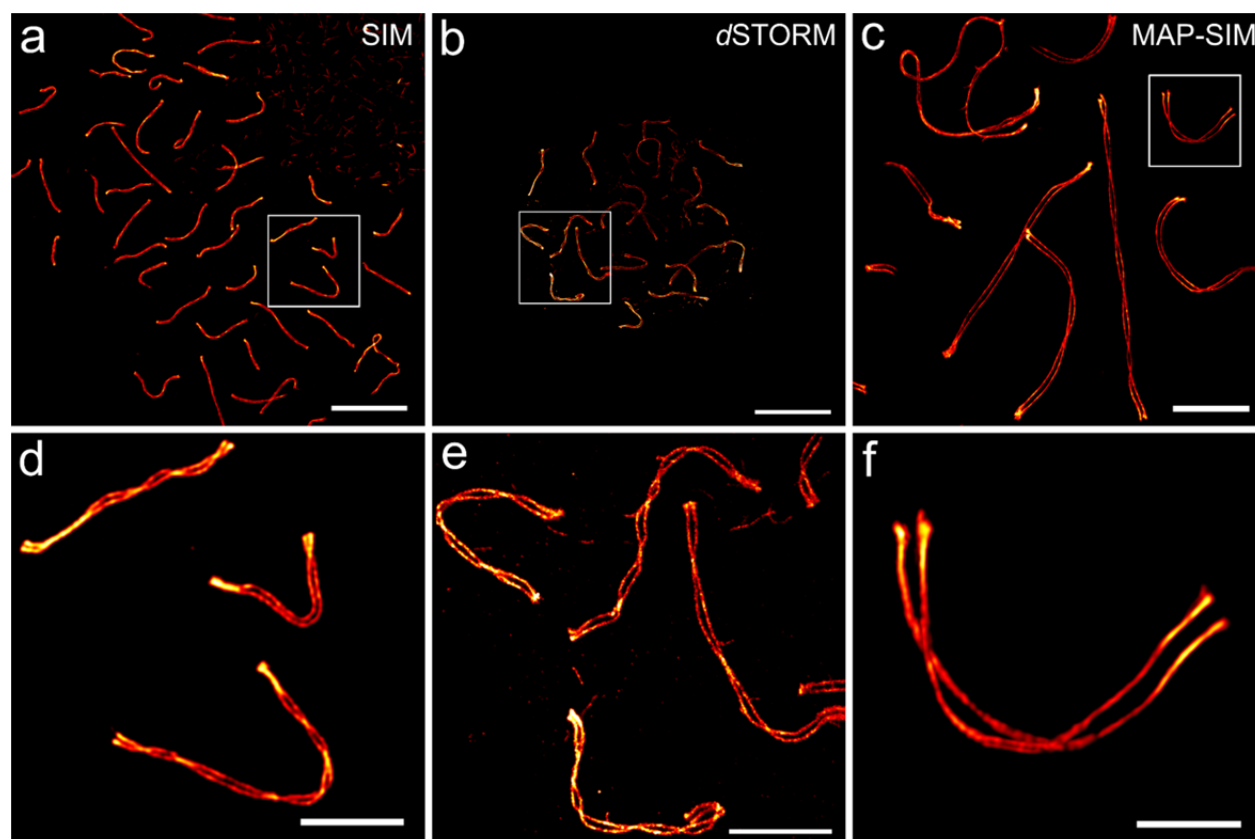

717

718 **Figure 2. Super-resolution imaging of the lateral element protein SYCP3.** a, SIM image of  
719 unexpanded SYCP3 labeled with Alexa Fluor 568. b, dSTORM image of unexpanded SYCP3  
720 labeled with Alexa Fluor 647. c, Expanded MAP-SIM SYCP3 signal (maximum intensity  
721 projection) labeled with SeTau-647. d-f, Magnified views of boxed regions in (a), (b) and (c),  
722 respectively. The images indicate that MAP-SIM provides a similar labeling density and spatial  
723 resolution as dSTORM of 20-30 nm in the imaging plane. Scale bars. (a-c) 10  $\mu$ m. (d-f) 3  $\mu$ m.

724

725

726

727

728

729

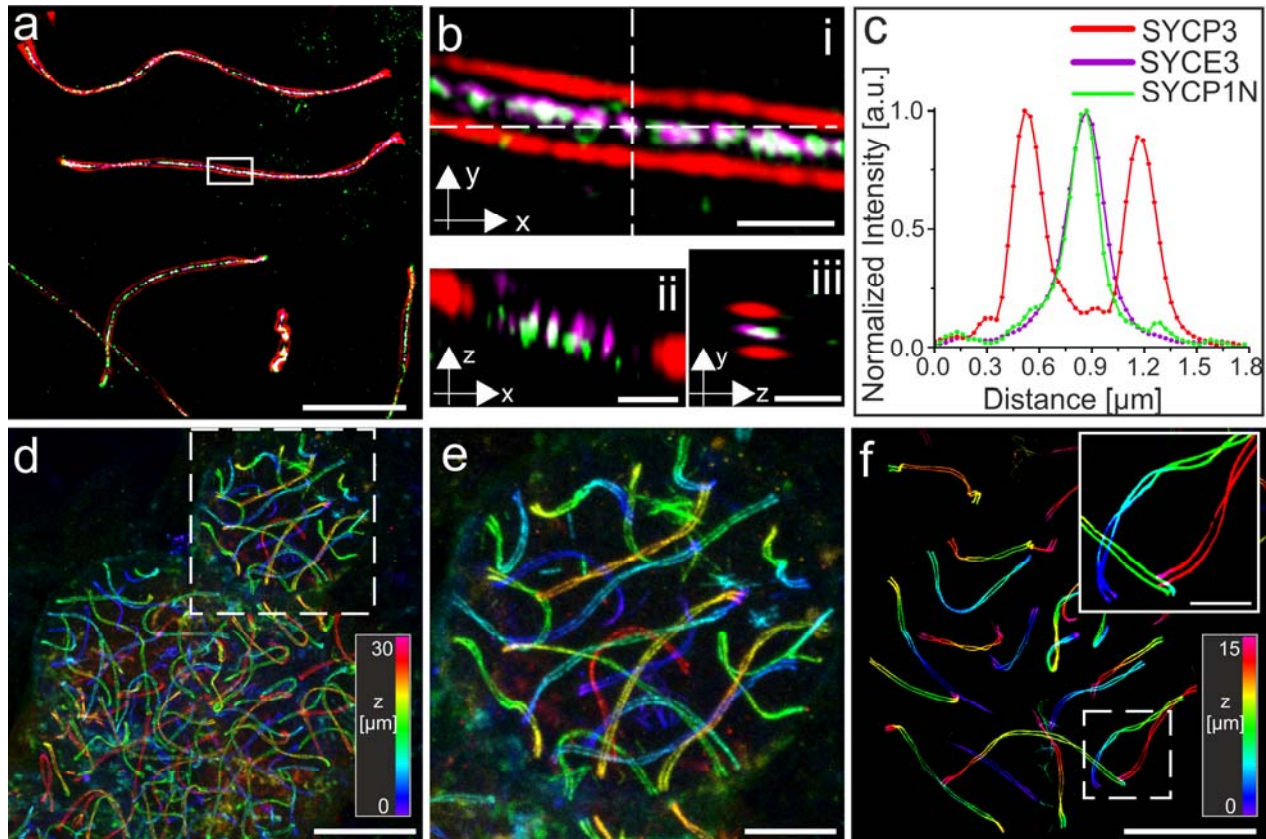

730

731 **Figure 3. 3D-Multicolor MAP-SIM of SYCP3, SYCP1 N-terminus, and SYCE3.** **a**, SIM image  
732 of post-expansion SeTau-647 labeled SYCP3 as a component of the lateral element (red), the  
733 transverse filament SYCP1 N-terminus labeled with Alexa Fluor 488 (green) and SYCE3 of the  
734 central element labeled with Alexa Fluor 568 (magenta). **b**, Magnified views of white boxed  
735 region in (a). **ii**, Orthogonal view of horizontal white dashed line in (i). **iii**, Orthogonal view of  
736 vertical white dashed line in (i). **c**, Transversal intensity profile perpendicular to the orientation of  
737 the SC shown in (b). The selected section exhibits a bimodal distribution of the SYCP3 signal  
738 separated by  $667.0 \text{ nm} \pm 7.1 \text{ nm}$ . The SYCP1 N-terminus and SYCE3 signals of the section (b)  
739 show monomodal distributions with FWHM of  $214.7 \pm 6.9 \text{ nm}$  and  $258.3 \pm 4.8 \text{ nm}$ , respectively.  
740 **d**, Large field of view ( $100 \times 100 \times 30 \text{ } \mu\text{m}^3$ ) 3D-Re-scan confocal microscopy image of spreaded  
741 cells. SYCP3 was labeled post-expansion with SeTau-647. **e**, Magnified view of boxed region in  
742 (d). **g**, 3D-MAP-SIM image of the SCs of an entire set of chromosomes in a spermatocyte  
743 visualized by post-expansion labeling of SYCP3 with SeTau-647. The inlet shows the enlarged  
744 view of the boxed region in (f). Scale bars. (a)  $10 \text{ } \mu\text{m}$ . (b-d)  $1 \text{ } \mu\text{m}$ . (f)  $10 \text{ } \mu\text{m}$ . (g)  $15 \text{ } \mu\text{m}$ . (h)  $5 \text{ } \mu\text{m}$ .

745

746

747

748

749

750

751

752

753

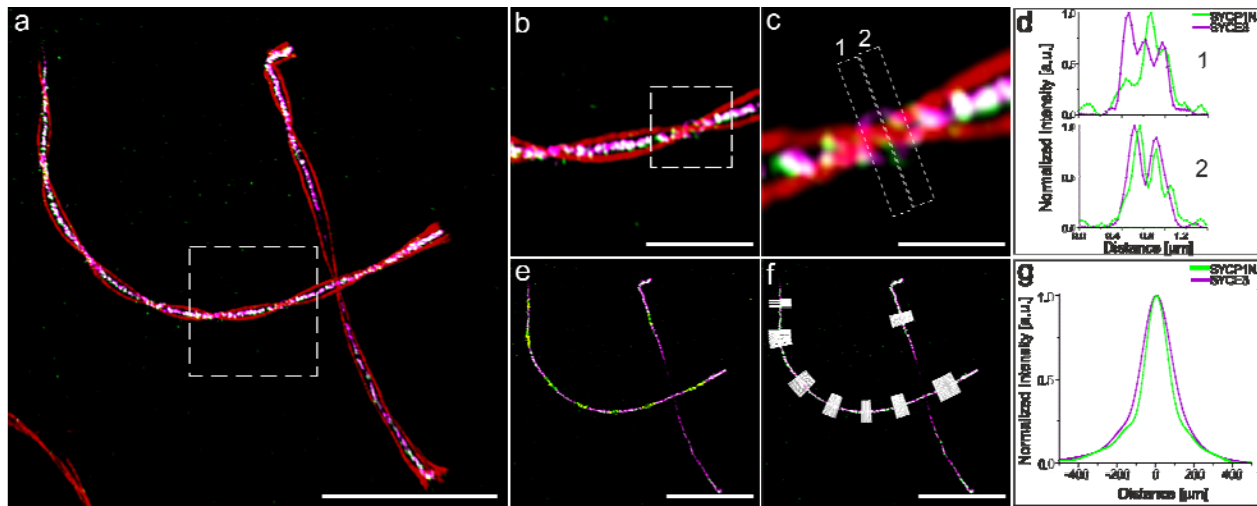

754

755 **Figure 4. Protein distribution of the SYCP1 N-terminus reveals complex network**  
756 **organization of the SC central region. a,** Lateral view MAP-SIM image of SYCE3 labeled with  
757 Alexa Fluor 568 (magenta), SYCP1N labeled with Alexa Fluor 488 (green) and SYCP3 labeled  
758 with SeTau-647 (red). Regions where the SC twists as visualized by the twisting SYCP3 signal  
759 (lateral view) show partially a multimodal organization of the N-terminus of the transverse  
760 filament protein SYCP1 and the central element protein SYCE3. **b,** Magnified view of white  
761 boxed region in (a). **c,** Enlarged view of highlighted region in (b) with two sites selected for  
762 protein distribution analysis (1, 2). **d,** Respective cross-sectional intensity profiles along SYCE3  
763 and SYCP1N of the regions specified in (c). **e,** SYCE3 and SYCP1N signals as in (a) without  
764 SYCP3 signal. Frontal views of the two proteins used for cross-sectional profiles are shown in  
765 yellow. **f,** as in (e) with line profiles (white) perpendicular to the frontal view of the SYCE3 signal.  
766 **g,** Averaged intensity line profile of all profiles shown in (f) with a monomodal signal distribution  
767 of  $168.0 \pm 1.1$  nm (SD) for SYCP1N and  $211.43 \pm 0.89$  nm for SYCE3 derived from single  
768 Gaussian fitting. Scale bars, (a) 10  $\mu$ m, (b) 3  $\mu$ m, (c) 1  $\mu$ m, (e-f) 10  $\mu$ m.

769

770

771

772

773

774

775

776

777

778

779

780

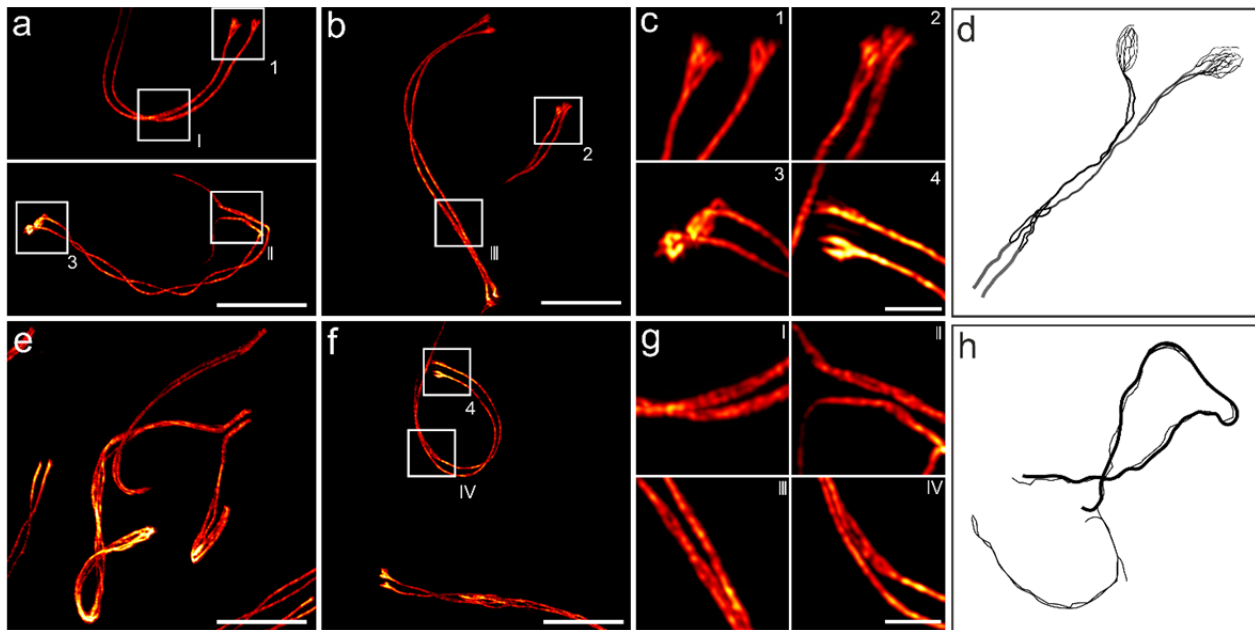

781

782

783

784

785

786

787

788

789

790

791

792

**Figure 5. Structural details of the SC lateral element revealed by MAP-SIM of SYCP3. a-c, f, g,** The SYCP3 signal shows occasional bifurcation along the two SC strands (I-IV) and various degrees of fraying at their ends depending on the respective pachytene stage (1-4). **e,** Unpaired regions of the XY pair also show a strong degree of fraying. **d, h,** Schematic representations of early EM reports of two or more sub lateral elements (subLEs) in mammals<sup>38,40</sup> in accordance with the splitting of the SYCP3 signal resolved by MAP-SIM in this study. **d,** Representation of the lateral element strand splitting in two and fraying at its end according to Figure 4b and 3a of del Mazo and Gil-Alberdi, 1986<sup>38</sup>. **h,** Fraying of LEs associated with unpaired regions of the XY pair modelled after Figure 10c of Dresser and Moses, 1980<sup>40</sup>. Scale bars, **(a-b)** 7  $\mu\text{m}$ , **(c)** 1.5 $\mu\text{m}$ , **(e-f)** 7  $\mu\text{m}$ , **(g)** 1.5 $\mu\text{m}$ .

793

794

795

796

797

798

799

800

801  
802  
803  
804  
805  
806  
807  
808  
809  
810  
811  
812  
813  
814  
815  
816  
817  
818  
819  
820  
821  
822  
823  
824  
825  
826  
827  
828  
829  
830

## Supplementary Figures

### Tracking down the molecular architecture of the synaptonemal complex by expansion microscopy

Fabian U. Zwettler<sup>#1</sup>, Marie-Christin Spindler<sup>#2</sup>, Sebastian Reinhard<sup>1</sup>, Teresa Klein<sup>1</sup>,  
Andreas Kurz<sup>1</sup>, Markus Sauer<sup>\*1</sup>, and Ricardo Benavente<sup>\*2</sup>

<sup>1</sup>Department of Biotechnology and Biophysics, Biocenter, University of Würzburg,  
Am Hubland, 97074 Würzburg, Germany

<sup>2</sup>Department of Cell and Developmental Biology, Biocenter, University of Würzburg,  
Am Hubland, 97074 Würzburg, Germany

<sup>#</sup>These authors contributed equally to this work

Correspondence and requests for materials should be addressed to M.S. and R.B.  
([m.sauer@uni-wuerzburg.de](mailto:m.sauer@uni-wuerzburg.de) and [benavente@biozentrum.uni-wuerzburg.de](mailto:benavente@biozentrum.uni-wuerzburg.de))

831

|                                  | <b>Primary antibodies</b>                              | <b>Secondary antibodies</b>                                                      | <b>Figures</b>                                          |
|----------------------------------|--------------------------------------------------------|----------------------------------------------------------------------------------|---------------------------------------------------------|
| <b>dSTORM</b>                    | SYCP3 (guinea pig)                                     | Al647 goat anti guinea pig                                                       | Fig.2b,2e; S.Fig. 3                                     |
| <b>Unexpanded SIM</b>            | SYCP3 (rabbit)                                         | Al568 goat anti rabbit                                                           | Fig.2a, 2d                                              |
| <b>MAP-SIM</b><br><b>MAP-RCM</b> | SYCP3 (mouse)<br>SYCE3 (rabbit)<br>SYCP1N (guinea pig) | SeTau647 goat anti mouse<br>Al568 goat anti rabbit<br>Al488 goat anti guinea pig | Fig.2c,2f;<br>Fig.3; Fig.4; Fig. 5;<br>S.Fig 1; S.Fig 2 |
| <b>U-ExM SIM</b>                 | SYCP3 (mouse)<br>SYCE3 (rabbit)<br>SYCP1N (guinea pig) | SeTau647 goat anti mouse<br>Al568 goat anti rabbit<br>Al488 goat anti guinea pig | S.Fig 4a-c                                              |

832

833 **Supplementary Table 1: Immunolabeling used in the different experiments**

|                |                                  |                                                 |            |
|----------------|----------------------------------|-------------------------------------------------|------------|
| <b>Pro-ExM</b> | SYCP3 (mouse)<br>SYCP1N (rabbit) | Al488 goat anti mouse<br>Al647 goat anti rabbit | S.Fig 4d-f |
|----------------|----------------------------------|-------------------------------------------------|------------|

834

835

836

837

838

839

840

841

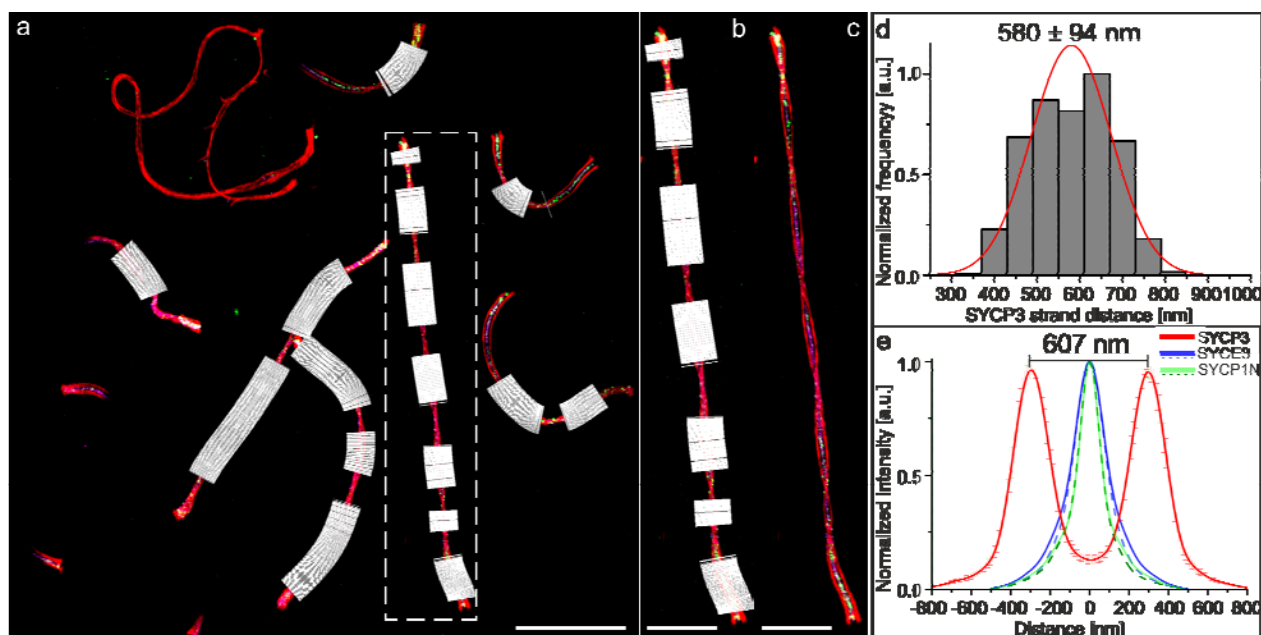

842

843

844 **Supplementary Figure 1. 2-channel-mode.** **a**, Three-color-SIM image (maximum intensity  
845 projection) with line profiles (white) oriented along the SC at regions where SYCP3 shows a  
846 bimodal signal distribution using SYCE3 as criterion for the center of the SC. SYCP3 labeled  
847 with SeTau647 (red), SYCP1N labeled with Alexa Fluor 488 (green) and SYCE3 labeled with  
848 Alexa Fluor 568 (magenta). **b**, Magnified view of white dashed box in **(a)**. **c**, Same as **(b)**  
849 without line profiles. **d**, Histogram of SYCP3 distances of 17,607 line profiles determined from 97 MAP-  
850 SIM expanded and imaged SCs from two separate experiments. The SYCP3 distance has been  
851 determined to  $580 \pm 93$  nm (SD). **e**, Averaged intensity profiles of SYCP3 (red), SYCE3 (blue)  
852 and SYCP1N (green) of all analyzed MAP-SIM data in **(d)**. Dashed curves show the averaged  
853 protein distribution of line profiles only set at frontal views of SYCP3. Whereas solid lines are  
854 from data along the complete SC including areas where SYCP3 shows a helical crossing. Fitting  
855 of the SYCP3 distribution with a bimodal Gaussian function resulted in a peak-to-peak distance



856 of 607 nm. SYCP1N and SYCE3 showed a monomodal protein distribution of  $161.5 \pm 1.3$  nm  
857 (FWHM) for SYCP1N and  $229.3 \pm 1.2$  nm (FWHM) for SYCE3 including SYCP3 crossing point  
858 areas. Analysis of the protein distributions without SYCP3 crossing point areas resulted in  
859 FWHM of  $160.2 \pm 1.1$  nm for SYCP1N and  $207.5 \pm 0.78$  nm for SYCE3. Scale bar. (a) 10  $\mu$ m.  
860 (b-c) 5  $\mu$ m.

861  
862  
863

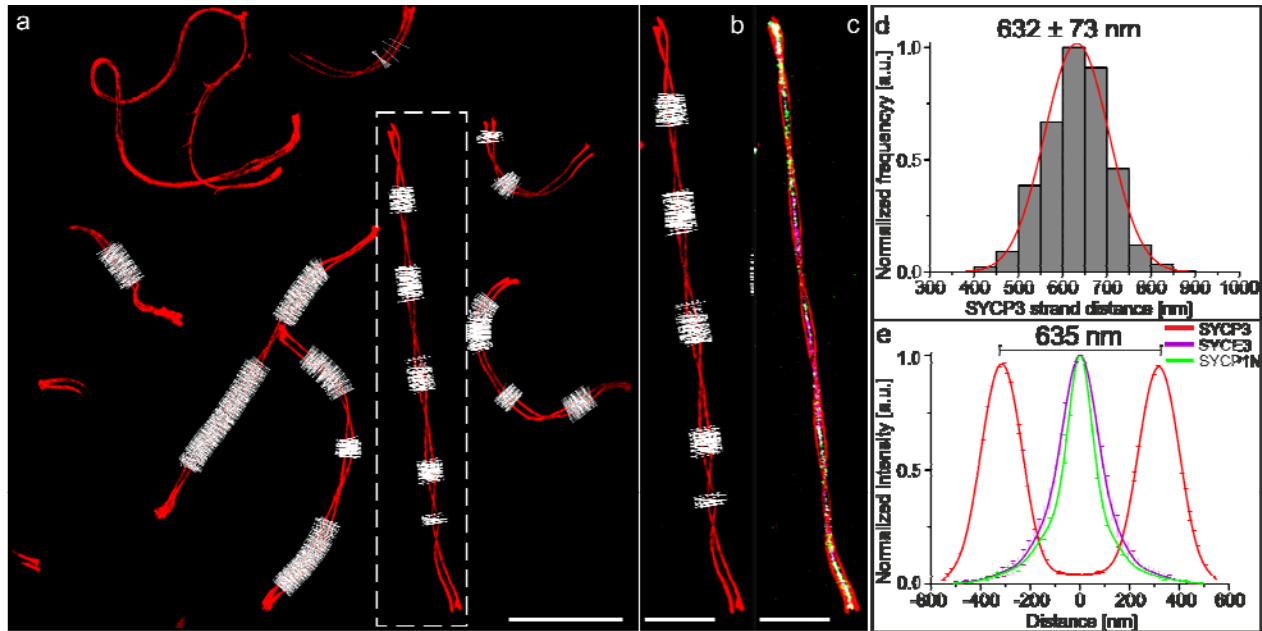

864  
865

866 **Supplementary Figure 2. 1-channel mode.** a, Same three-color-SIM image (maximum  
867 intensity projection) as shown in **Supplementary Fig. 1** but with line profiles (white) oriented  
868 along the SC with SYCP3 (red) as criterion for the center of the SC. Profiles are set at regions  
869 where a bimodal signal distribution of the protein is occurring. b, Magnified view of white dashed  
870 box in (a). c, Same as (b) with SYCP1N (green) and SYCE3 (magenta) without cross-sectional  
871 profiles. d, Histogram of SYCP3 distances of 18,136 line profiles determined from the same data  
872 set analyzed in **Supplementary Fig. 1**. The SYCP3 distance has been determined to  $632 \pm 73$   
873 nm (SD). Note that different values of the strand distances compared to **Supplementary Fig. 1c**  
874 occur from areas that are not detected for line profiling that are closer to helical crossing overs  
875 when using SYCP3 to determine the center of the SC. e, Averaged intensity profiles of SYCP3  
876 (red), SYCP1 N (green) and SYCE3 (magenta) of the analyzed MAP-SIM data in (d). Fitting of  
877 the SYCP3 distribution with a bimodal Gaussian function results in a peak-to-peak distance of  
878 635 nm. Scale bar. (a) 10  $\mu$ m. (b-c) 5  $\mu$ m.

879  
880  
881

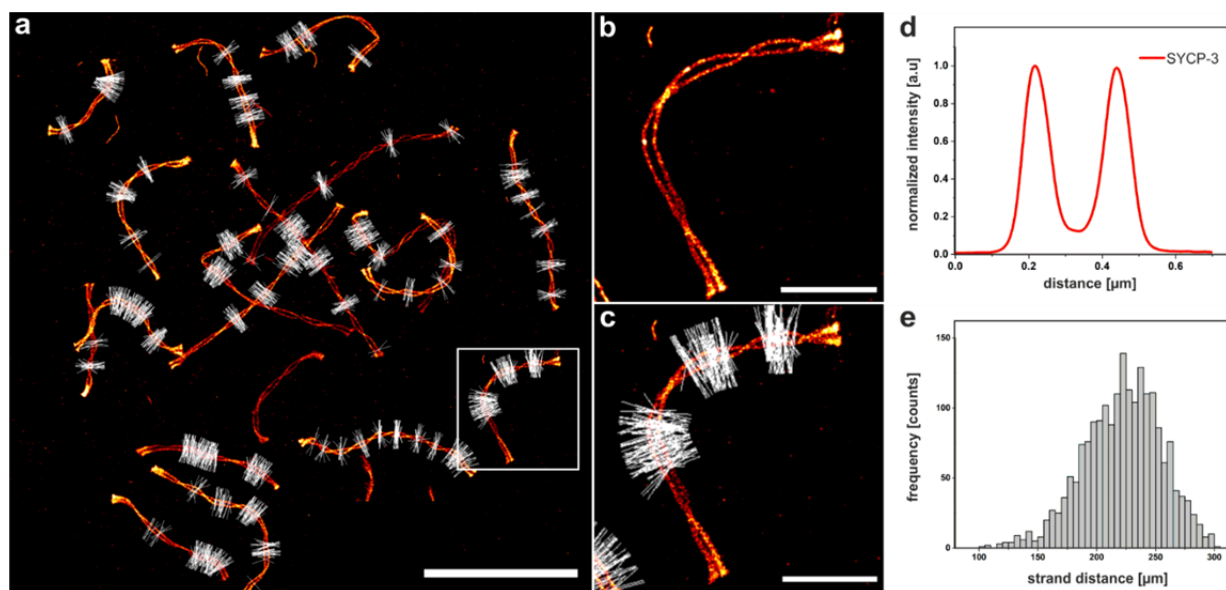

882  
883

884 **Supplementary Figure 3.** **a**, dSTORM image of unexpanded SYCP3 labeled with Alexa Fluor  
885 647 (red) with intensity line profiles (white) along the SC using SYCP3 to define the center and  
886 orientation of the complexes. **b**, Enlarged view of white box highlighted in (a) without line  
887 profiles. **c**, Same as (b) with line profiles (white) along the SYCP3 signal. **d**, Averaged intensity  
888 line profile of all profiles shown in (a). A bimodal Gaussian fit of the protein positions gives a  
889 peak-to-peak distance of 230 nm (SD). **e**, Histogram of SYCP3 strand distances resulting from  
890 line profiles shown in (a) with a mean value of  $222 \pm 33$  nm (SD). Scale bars, (a)  $10\mu\text{m}$ , (b-c)  
891  $2\mu\text{m}$ .

892  
893  
894  
895  
896  
897  
898  
899  
900  
901  
902  
903  
904  
905  
906  
907  
908

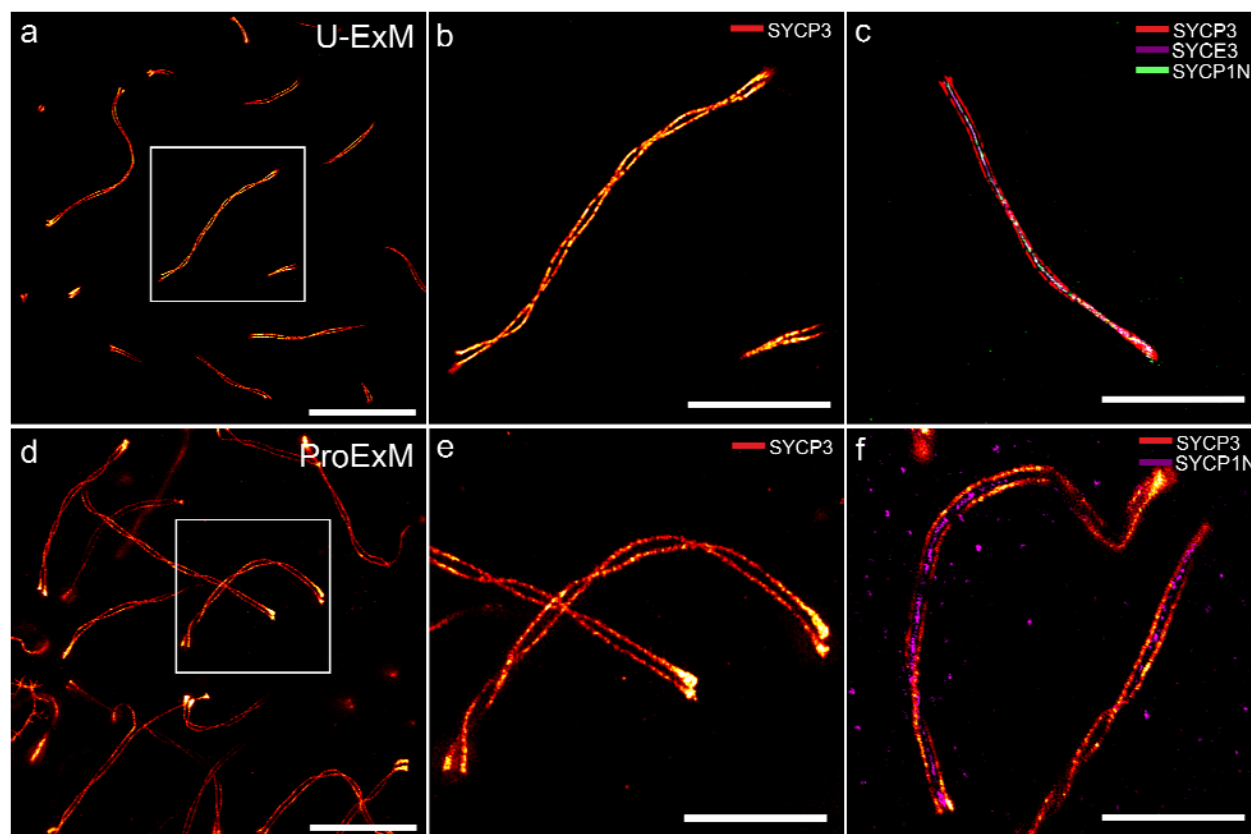

909  
910  
911 **Supplementary Figure 4.** **a**, SIM image (maximum intensity projection of a z-stack) of U-ExM  
912 expanded SCs, post-expansion labeled for SYCP3 by immunolabeling with SeTau647. **b**,  
913 Magnified view of boxed region in **(a)**. **c**, Maximum intensity projection of a z-stack of a  
914 multicolor SIM image of an U-ExM expanded SC post-expansion labeled with SeTau647 for  
915 SYCP3 (red), SYCE3 labeled with labeled with Alexa Fluor 568 (magenta), and SYCP1N labeled  
916 with Alexa Fluor 488 (green). **d**, SIM image (maximum intensity projection of a z-stack)  
917 of proExM expanded SCs, pre-expansion labeled for SYCP3 by immunolabeling with Alexa Fluor  
918 488. **e**, Magnified view of boxed region in **(d)**. **f**, Maximum intensity projection of a z-stack of a  
919 two-color SIM image of a proExM expanded SC pre-expansion labeled with Alexa Fluor 488 for  
920 SYCP3 (red) and SYCP1N labeled with labeled with Alexa Fluor 647 (magenta). Scale bars. **(a)**  
921 20  $\mu\text{m}$ , **(b-c)** 10  $\mu\text{m}$ , **(d)** 20  $\mu\text{m}$ , **(e-f)** 10  $\mu\text{m}$ .

922  
923  
924  
925  
926  
927  
928  
929  
930  
931  
932  
933  
934  
935  
936

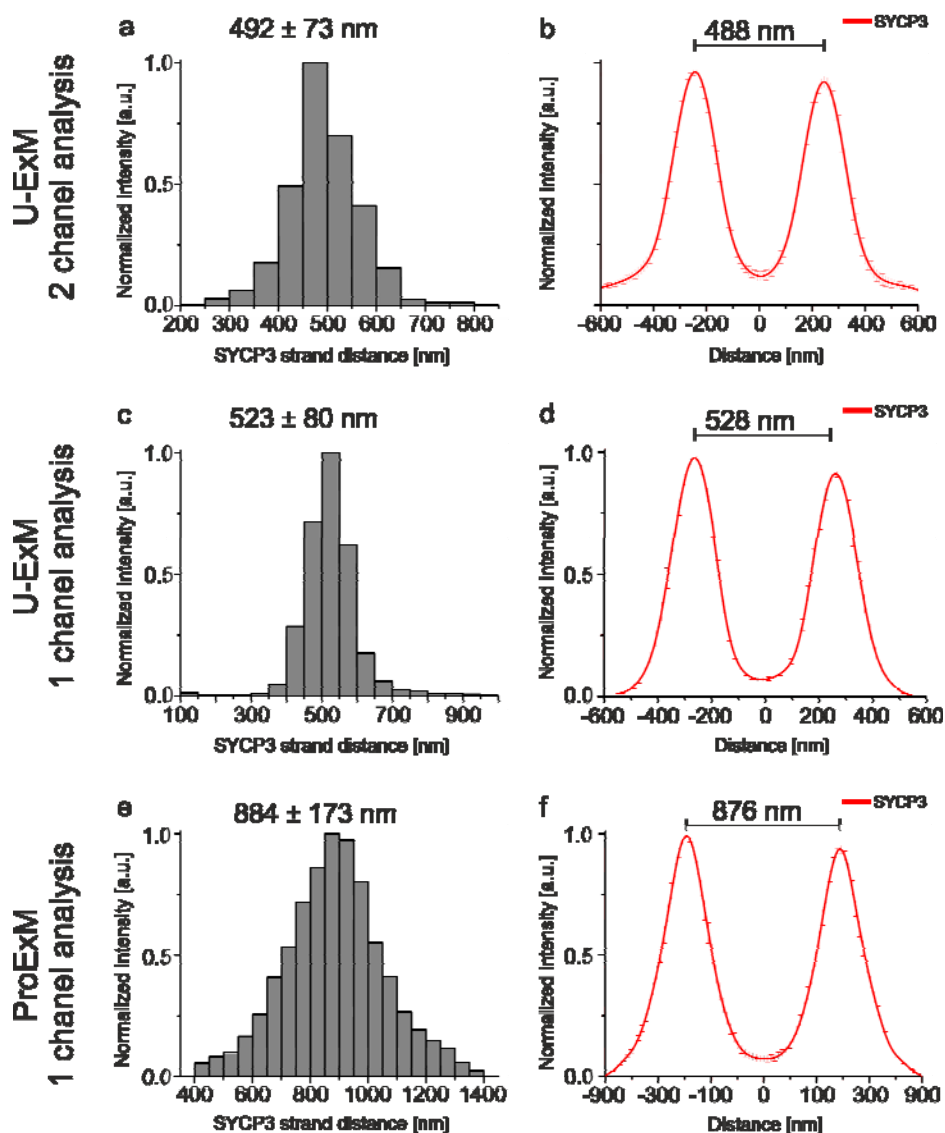

937  
938  
939 **Supplementary Figure 5.** a, Histogram of SYCP3 distances determined from U-ExM  
940 experiments. The mean distance has been determined to  $492 \pm 73$  nm (SD) from 3,528 intensity  
941 line profiles of 24 expanded SCs from two separate expansion experiments. The SYCE3  
942 channel was used to align the line profiles. b, Averaged intensity profiles of SYCP3 (red) of U-  
943 ExM data from (a). c-d, Same data as in (a). Here, the SYCP3 channel was used to align the  
944 line profiles. The mean distance has been determined to  $523 \pm 80$  nm (SD) from 3528 intensity  
945 line profiles of 24 expanded SCs from two separate expansion experiments. d, Averaged  
946 intensity profiles of SYCP3 (red) of U-ExM data from (c). e, Histogram of SYCP3 distances of  
947 proExM experiments. The mean distance has been determined to  $884 \pm 173$  nm (SD) from  
948 73427 cross-sectional profiles along 50 expanded SCs. The SYCP3 channel was used to align  
949 the line profiles. f, Averaged intensity profiles of SYCP3 (red) of proExM data from (e). All data  
950 were determined by fitting a bimodal Gaussian function to the histograms. With a bimodal  
951 distribution separated by 221nm as measured by dSTORM (Fig. 2b,e) U-ExM enabled post-  
952 expansion labeling with various fluorophores and three-color SIM with an expansion factor of ~  
953 2.4x. On the other hand, proExM provided an expansion factor of ~ 4.0x but pre-expansion  
954 labeling resulted generally in a lower labeling density.

955  
956

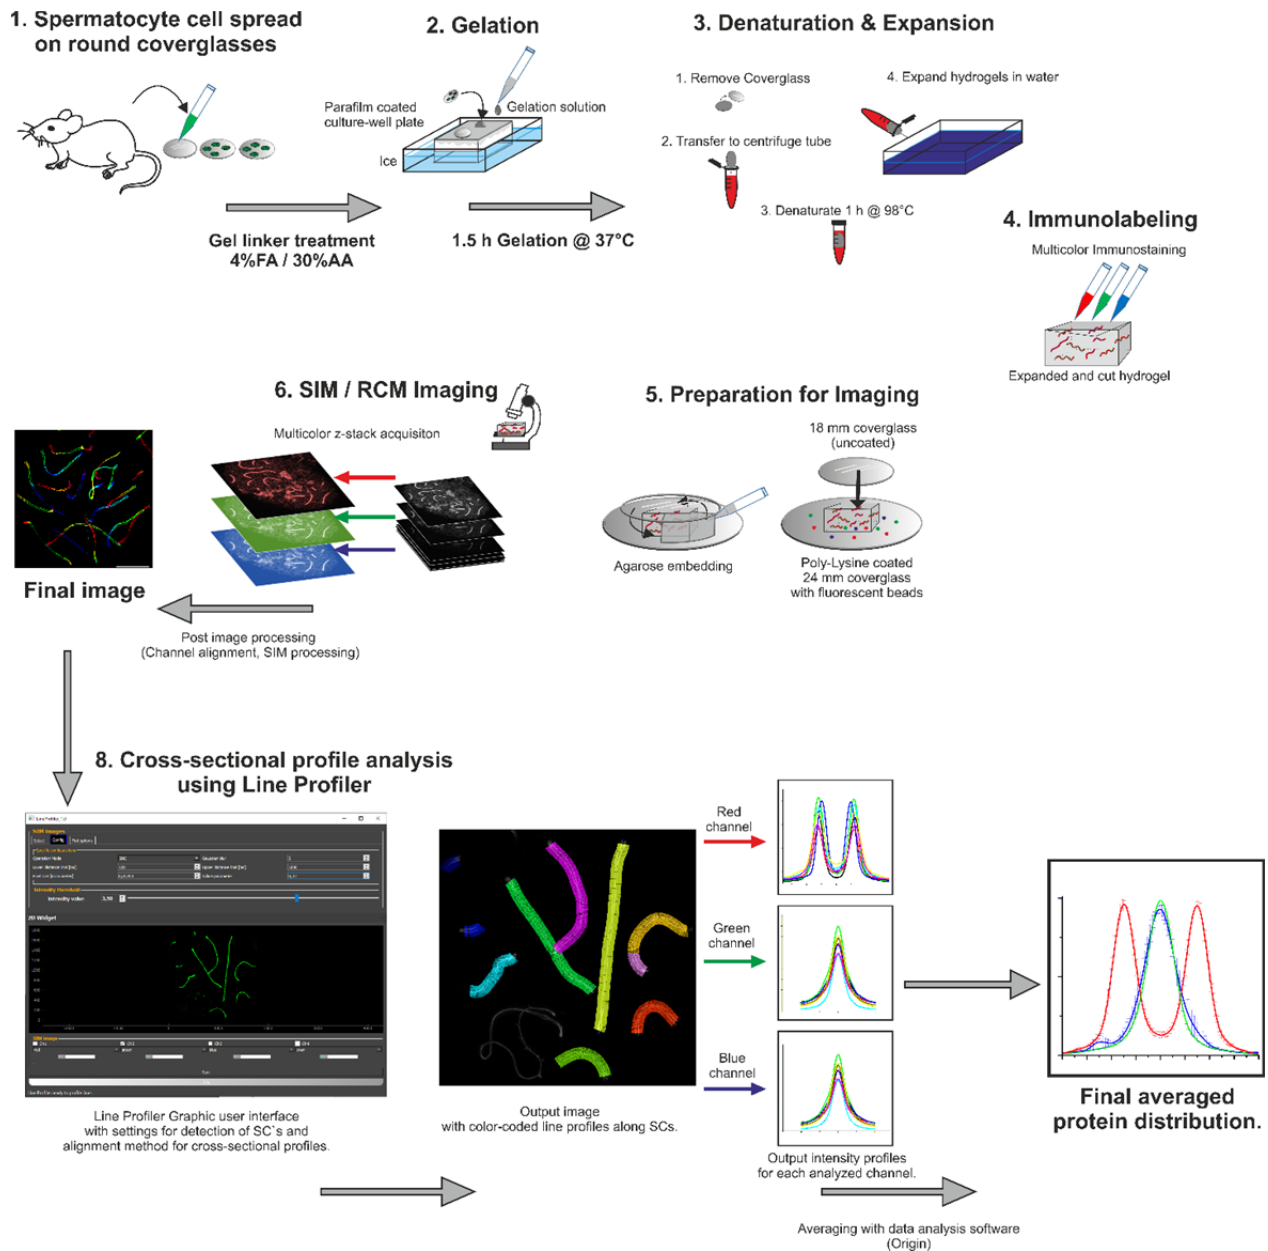

957  
958  
959  
960  
961  
962  
963  
964  
965  
966  
967  
968  
969  
970  
971  
972

**Supplementary Figure 6. Workflow of MAP-SIM expansion on SCs.** 1, First, spermatocytes are extracted from mice and then spread on round 18 mm coverslips. 2, After gel linker treatment, cells are gelated on a parafilm coated culture-well on ice. 3, Hydrogels are then removed carefully from the coverglass and placed into pre-heated denaturation buffer. After 1 hour of denaturation gels are placed into water for expansion. 4, Samples are immunolabeled successively with primary and secondary antibodies. 5, Immunolabeled gels are then immobilized on Poly-Lysine coated coverslips and additionally embedded with agarose to prevent drift during imaging. 6, Samples can then be imaged with SIM or another available imaging technique. After image acquisition post-processing results in the final images (7) of SCs. 8, Images are then further analyzed using the Line Profiler software enabling analysis of protein distributions in several channels. After averaging of cross-sectional profiles a final averaged protein distribution curve is generated.

973  
974 **Supplementary Video 1. 3D-Multicolor MAP-SIM of SYCP3, SYCP1 N-terminus, and**  
975 **SYCE3.**

976 Expansion microscopy (MAP) of synaptonemal complex (SC) proteins imaged with structured  
977 illumination microscopy (SIM). SYCP3 of the lateral element labeled with Setau647 (red), the N-  
978 terminus of transverse filament protein SYCP1 labeled with Alexa 488 (green) and SYCE3 of the  
979 central element labeled with Alexa 568 (magenta) on a nuclear spreading shown in pachynema.  
980 The xy pair can be distinguished by the short synapsed pseudoautosomal region indicated by  
981 the presence of all three SC proteins and the larger unsynapsed parts of the x and the y pair that  
982 are only associated with SYCP3. The movie sequence shows the progression through the  
983 acquired z-stack. SYCP3, SYCP1N and SYCE3 of the triple immunolocalization are further  
984 shown separately to provide better visibility of details of the SC's molecular architecture revealed  
985 by MAP-SIM. Note, e.g., that zoomed-in views of the areas where the SC twists (lateral view),  
986 suggest a complex architecture of the central element where SYCE3 and the SYCP1 N-terminus  
987 reside.

988  
989

990 **Supplementary Video 2. Structural details of the SC lateral element revealed by MAP-SIM**  
991 **of SYCP3.** Movie sequence showing the expanded lateral element protein SYCP3 (red, labeled  
992 with Setau647) of two SCs in pachynema. Note the fraying of the SYCP3 signal at both ends  
993 and the occasional bifurcation of the signal along the length of the SC that is in agreement with  
994 EM findings of sub-lateral elements (subLEs) in murine spreadings<sup>38</sup>.

995  
996
